# Supplementary material for: Dynamic pyridinethiol ligand shuttling within iron-anchored covalent organic frameworks boosts CO 2 photoreduction
Source: Royal Society of Chemistry journal article supplement (doi:10.1039/d4ta07403c), 2024-12-02
Supplement: d4ta07403c1.pdf [file d4ta07403c1.pdf]

## Supporting Information

### **Dynamic Pyridinethiol Ligand Shuttling within Iron-Anchored Covalent Organic Frameworks Boosts CO<sub>2</sub> Photoreduction**

*Yong-Kang Zhang,<sup>a</sup> Lan Zhao,<sup>a</sup> Alexander O. Terent'ev,<sup>b</sup> Liang-Nian He\*<sup>a</sup>*

<sup>a</sup> State Key Laboratory and Institute of Elemento-Organic Chemistry, Frontiers Science Center for New Organic Matter, College of Chemistry, Nankai University, Tianjin 300071, P. R. China

<sup>b</sup> Zelinsky Institute of Organic Chemistry, Russian Academy of Sciences, 47 Leninsky Prospect, Moscow 119991, Russia

\*Corresponding Author

E-mail Addresses: heln@nankai.edu.cn (L.-N. He)

## Table of Contents

|                                                                                          |     |
|------------------------------------------------------------------------------------------|-----|
| <b>1. Materials</b> .....                                                                | S3  |
| <b>2. Synthesis</b> .....                                                                | S3  |
| <b>3. Characterization</b> .....                                                         | S4  |
| <b>4. Photoelectrochemical measurements</b> .....                                        | S5  |
| <b>5. Preparation of working electrode</b> .....                                         | S5  |
| <b>6. Photocatalytic CO<sub>2</sub> reduction experiment</b> .....                       | S5  |
| <b>7. DFT calculation details</b> .....                                                  | S6  |
| <b>8. <sup>13</sup>CO<sub>2</sub> labeling experiment</b> .....                          | S6  |
| <b>9. Quantum yield measurement</b> .....                                                | S6  |
| <b>10. Supplementary figures and tables</b> .....                                        | S7  |
| <b>11. The coordinates of transition states in DFT calculation (in xyz format)</b> ..... | S24 |
| <b>12. Comparisons of catalytic activity</b> .....                                       | S35 |
| <b>13. References</b> .....                                                              | S36 |

## 1. Materials

All the solvents were purchased from Tianjin Bohua Chemical Reagents Co. Ltd. And argon (99.998%) and CO<sub>2</sub> (99.999%) were from Tianjin Haolun. The reagents 2,2'-bipyridyl-5,5'-dialdehyde (bpy-CHO, 97%), 1,3,5-tris-(4-aminophenyl)triazine (TAPT, 95%), iron(II) acetylacetonate (Fe(acac)<sub>2</sub>, 99%), pyridine-2-thiolate (pySH, 98%), 2-mercapto-5-methylpyridine (CH<sub>3</sub>-pySH, 97%), 3-aminopyridine-2-thiol (NH<sub>2</sub>-pySH, 97%), 2-mercaptonicotinic acid (COOH-pySH, 97%), 5-Chloropyridine-2-thiol (Cl-pySH, 98%), 6-sulfanylnicotinonitrile (CN-pySH, 96%), 2-mercapto-5-nitropyridine (NO<sub>2</sub>-pySH, 98%), 2-mercapto-5-(trifluoromethyl)pyridine (CF<sub>3</sub>-pySH, 97%), p-toluenethiol (CH<sub>3</sub>-phSH, 98%), 2-mercaptopyridine-N-oxide (NO-pySH, 98%), 2-hydroxypyridine-N-oxide (NO-pyOH, 98%), 4-mercaptopyridine (4-pySH, 97%), 2-hydroxythiophenol (2-phSHOH, 99%), 2,2'-dithiodipyridine (pyS-Spy, 98%), 2,2'-bipyridine (bpy, 99%), iron(III) chloride hexahydrate (FeCl<sub>3</sub>·6H<sub>2</sub>O, 98%), sodium methoxide (98%), acetic acid (98%), extra dry acetonitrile (CH<sub>3</sub>CN, 99.9%) were commercially available and used without further purification. 1,3-dimethyl-2-phenyl-2,3-dihydro-1*H*-benzo[*d*]imidazole (BIH) was synthesized according to the published procedure.<sup>1</sup>

## 2. Synthesis

**Synthesis of bpy-COF:** bpy-COF was synthesized according to the reported procedure<sup>2</sup>. In a 10 mL pressure tube, 1,3,5-tris-(4-aminophenyl) triazine (TAPT) (92 mg, 0.26 mmol) and 2,2'-bipyridyl-5,5'-dialdehyde (82.7 mg, 0.39 mmol) were dispersed in a mixed solution of mesitylene and 1,4-dioxane (6 mL, v/v 5.1/0.9), and ultrasonically dispersed for 30 min. Then 0.2 mL acetic acid was added to the resulting yellow suspension. After degassing with Ar by three freeze-pump-thaw cycles, the tube was sealed and heated to 120 °C for 3 d. The resulting yellow precipitate was collected by filtration and washed with tetrahydrofuran and acetone repeatedly to remove the residual guest molecules. After drying under vacuum at 105 °C for 12 h, the yellow powder was obtained with a yield of 84%.

**Synthesis of Fe-bpy-COF:** In a 100 mL flask, bpy-COF (160 mg) was treated with Fe(acac)<sub>2</sub> (76 mg, 0.3 mmol) in 30 mL of ethanol. First, the reaction mixture is dispersed by sonication for 30 minutes. Then it was stirred at room temperature for 12 h under Ar. After that, the precipitate was collected by filtration and successively washed with 500 mL of ethanol and dried under vacuum at 105 °C for 12 h, affording 165 mg dull yellow powder Fe-bpy-COF.

**Synthesis of FeS-bpy-COF:** In a 100 mL flask, Fe-bpy-COF (200 mg) was treated with pyridine-2-thiolate (pySH, 89 mg, 0.8 mmol) and sodium methoxide (54 mg, 1 mmol) in 30 mL of methanol. Then, the reaction mixture is sonicated for 30 min, and stirred at room temperature for 12 h under Ar. The precipitate was collected by filtration and successively washed with methanol and diethyl ether. The filter cake was dried under vacuum overnight to produce 181 mg yellowish-green powder FeS-bpy-COF.

**Synthesis of FebpyCl<sub>3</sub>:** FebpyCl<sub>3</sub> was synthesized according to the literature.<sup>3</sup> The FeCl<sub>3</sub>·6H<sub>2</sub>O (520 mg, 3.7 mmol) was entirely dissolved in 50 mL of ethanol and then a solution of 2,2'-bipyridine (1000 mg, 3.7 mmol) in 50 mL of ethanol was added dropwise to

the stirred solution of  $\text{FeCl}_3 \cdot 6\text{H}_2\text{O}$  at room temperature, resulting in an orange solution. The solution was stirred continuously for 12 h, gradually turning to orange suspension. After that, the orange precipitate was collected via filtration and washed with glacial ethanol ( $10 \times 3$  mL) and diethyl ether ( $5 \times 3$  mL) sequentially. Drying the precipitate under vacuum at room temperature produced a yellow powder and the yield was 75% (879 mg). UV-Vis (acetonitrile), 298 nm ( $\epsilon = 13710 \text{ M}^{-1} \text{ cm}^{-1}$ ), 362 nm ( $\epsilon = 5440 \text{ M}^{-1} \text{ cm}^{-1}$ ). Anal. Found: C, 37.05; H, 2.68; N, 7.99. Calculated for  $\text{C}_{10}\text{H}_8\text{N}_2\text{FeCl}_3$ : C, 37.73; H, 2.53; N, 8.80.

### 3. Characterization

Power X-ray diffraction (XRD) was performed on a Rigaku SmartLab D/max 2500 VL/PC diffractometer with the X-ray source of Cu  $K\alpha$  radiation ( $\lambda = 1.5418 \text{ \AA}$ ) at 40 kV, 150 mA and data were collected with a scan rate of  $0.5^\circ/\text{min}$  in the range of  $2^\circ$ - $40^\circ$ . FTIR spectra were recorded on a Bruker Tensor-II spectrophotometer. Solid state  $^{13}\text{C}$  NMR spectra were measured by Bruker Avance NEO 400 spectrometer.  $^1\text{H}$  NMR spectra were collected for liquid product analysis at room temperature on a Bruker Avance III 400 spectrometer. Scanning electron microscopy (SEM) images were obtained from FEI Apreo S LoVac emission electron microscope. Transmission electron microscopy (TEM) images were obtained from FEI Tecnai G2 F20 transmission electron microscope. XPS X-ray photoelectron spectra (XPS) data were collected using a Kratos Analytical Axis Ultra DLD spectrometer equipped with a monochromatic Al  $K\alpha$  X-ray source (1486.6 eV) operated at 100 W. After calibration using the binding energy of 284.0 eV of  $\text{sp}^2\text{-C}$  in the C1s peak, the photoelectron spectroscopy was analyzed. Gas adsorption isotherms were conducted on a micromeritics ASAP 2460 instrument. All the samples were outgassed at  $100^\circ\text{C}$  for 4 h in a vacuum before measurements.  $\text{N}_2$  gas adsorption isotherms were measured at  $-196^\circ\text{C}$  using a liquid  $\text{N}_2$  bath. Surface areas were calculated based on Brunauer-Emmett-Teller (BET) method.  $\text{CO}_2$  adsorption and desorption isotherms were measured at  $0^\circ\text{C}$  and  $25^\circ\text{C}$ . The relationship between adsorption pressure and  $\text{CO}_2$  adsorption at different temperatures was obtained by fitting the adsorption data with the Freundlich isothermal model. Subsequently, the obtained data were substituted into the Clausius-Clapeyron equation to finally acquire the curve of isosteric adsorption heat as a function of  $\text{CO}_2$  adsorption. UV-vis absorption spectra were measured on an Agilent Cary 60 spectrometer for liquid samples. UV-vis diffuse reflectance spectroscopy (UV-vis DRS) was conducted on a Hitachi UH4100 spectrometer for solid powder samples with  $\text{BaSO}_4$  as the reference. Element analysis test was carried out on a vario EL CUBE elemental. Inductively coupled plasma-optical emission spectrometry (ICP-OES) was carried out on a SpectroBlue IL instrument. Steady-state photoluminescence (PL) spectra and Time-resolved photoluminescence (TRPL) decay spectra were recorded at room temperature on an Edinburgh FS5 spectrophotometer. Femtosecond transient absorption spectroscopy (fs-TAS) measurements were performed on a Helios (Ultrafast systems) spectrometers using a regeneratively amplified femtosecond Ti: sapphire laser system (Legend Elite-1K-HE, frequency, 1 kHz; max pulse energy,  $\sim 4$  mJ; pulse duration, 25 fs) at room temperature. The pump wavelength is 370 nm. Finally, analyze the data through commercial software (Surface Explorer, Ultrafast Systems). Electrospray ionization mass spectra (ESI/MS) were obtained on an Agilent 6520 Q-TOF LC/MS spectrometer.

#### 4. Photoelectrochemical measurements

All the electrochemical measurements were conducted in 0.5 M Na<sub>2</sub>SO<sub>4</sub> electrolyte solution on a CHI potentiostat/galvanostat (CHI660D, CH Instruments Inc., Shanghai) electrochemical working station *via* a standard three-electrode system. The working electrode is indium-doped tin oxide (ITO) glass plate coated with catalyst slurry, the counter electrode is platinum foil, and Ag/AgCl (saturated KCl) as reference electrode, respectively. Mott-Schottky plots were recorded at different frequencies of 500, 1000, and 1500 Hz. Electrochemical impedance spectroscopy (EIS) was recorded over a 0.1-10000 Hz frequency range. The transient photocurrent responses were recorded over a sampling interval of 20 s using a 300 W Xe lamp equipped with an optical filter ( $\lambda \geq 400$  nm). Linear sweep voltammetry (LSV) curves were recorded in the range of 0 ~ -1.1 V and the sweep rate was 10 mV/s in 0.5 M KHCO<sub>3</sub> electrolyte solution. Cyclic voltammetry (CV) measurements were performed using a four-neck flask with a 3 mm diameter glassy carbon working electrode, Pt sheet auxiliary electrode, and Ag/AgCl (saturated KCl) reference electrode. Electrochemical experiments conducted in 0.1 M tetrabutylammonium hexafluorophosphate in CH<sub>3</sub>CN were performed under CO<sub>2</sub> by bubbling for 5 min. The ferrocene was added to organic phase in the last step of the experiments and recorded to calibrate the consistency of the reference electrode, and the corresponding reduction potentials are reported versus the Fc/Fc<sup>+</sup> couple.

#### 5. Preparation of working electrode

The preparation of the working electrode referred to the previously reported procedure<sup>4</sup>: 2 mg sample was dispersed in 480  $\mu$ L dimethylformamide containing 20  $\mu$ L Nafion solution (5%) and ultrasound for 30 min. Subsequently, 100  $\mu$ L of the mixture was dropped on 1\*1 cm<sup>2</sup> ITO and left in the air to dry.

#### 6. Photocatalytic CO<sub>2</sub> reduction experiment

For typical run, a 10 mL Schlenk tube containing 1 mg Fe-bpy-COF, 0.4 mM pySH (0.14 mg, 1.2  $\mu$ mol), 1.5 M H<sub>2</sub>O (81  $\mu$ L, 4.5 mmol) and 0.025 M BIH (16.8 mg, 75  $\mu$ mol) in 3 mL CH<sub>3</sub>CN solution was degassed with CO<sub>2</sub> for three freeze-pump-thaw cycles before irradiation at 20 °C with a 300 W Xe lamp equipped with an optical filter ( $\lambda \geq 400$  nm). The amount of CO and H<sub>2</sub> produced was analyzed by gas chromatography (GC, FuLi 97902II) with a TCD detector equipped with a packed column TDX-01. The typical volume of injected gas was 1 mL aliquots from the headspace of the reaction cell. Calibration curves were obtained by sampling known amounts of H<sub>2</sub> and CO. Additionally, formate product was quantified by <sup>1</sup>H NMR on a Bruker AV400 spectrometer. A certain amount of the reaction solution was withdrawn, and the insoluble substances were removed by filtration. Then 350  $\mu$ L was taken out to which 100  $\mu$ L of acetonitrile-*d*<sub>3</sub> and 50  $\mu$ L of 10 mM 1,3,5-trimethoxybenzene (TMB) in CH<sub>3</sub>CN as internal standard were added. A calibration curve for the detection of formate was determined from the ratio between the area of the formate C-H peak and the aromatic proton signal of 1,3,5-trimethoxybenzene using increasing concentrations of formate. The amount of formate generated in the catalytic test was then determined using this calibration curve.

For the recyclability experiments, the photocatalyst was centrifuged and washed by water and ethanol after each circle illumination (4 h), respectively. Then the Schlenk tube was refilled 3 mL mixed solution of acetonitrile containing 1.5 M H<sub>2</sub>O, 0.025 M BIH and 0.4 mM pySH, and the system was degassed with CO<sub>2</sub>. Finally, the solution was irradiated under a 300

W Xenon lamp with an optical filter ( $\lambda \geq 400$  nm) for the next circle illumination.

## 7. DFT calculation details

Geometry optimization and frequency analysis were performed in acetonitrile solvent with the SMD implicit-solvation model using B3LYP-D3/def2-SVP level. Single point energies were calculated at the B3LYP-D3/def2-TZVP level with the SMD model (acetonitrile solvent) on optimized geometries.<sup>5</sup> The activation barriers are calculated using H<sub>2</sub>O molecule as an explicit proton source. Time-dependent density functional theory (TDDFT) at the B3LYP-D3/def2-TZVP level of theory is used to model the electronic transitions on the COF fragment with Gaussian16. Hole-electron analysis was done to investigate the electronic excitation features with the aid of Multiwfn program.<sup>6</sup> The theoretical calculation of BDE values for S-H bond of thiol ligands were obtained by using DFT method M062X-D3/ def2-TZVP level. All of the theoretical calculations were performed with the Gaussian 16 program.<sup>7</sup>

## 8. <sup>13</sup>CO<sub>2</sub> labeling experiment

The CH<sub>3</sub>CN solution containing 1 mg Fe-bpy-COF, 0.4 mM pySH, 1.5 M H<sub>2</sub>O and 0.025 M BIH was degassed by freeze-pump-thaw cycles and then <sup>13</sup>CO<sub>2</sub> gas was introduced. The <sup>13</sup>CO<sub>2</sub> gas is generated from purchased Ba<sup>13</sup>CO<sub>3</sub> (abundance 98%). After irradiation for 4 h at 20 °C with a 300 W Xe lamp equipped with an optical filter ( $\lambda \geq 400$  nm), the evolved CO was detected by a GCMS-QP2010 SE and the generated formate in the reaction solutions was quantified using <sup>1</sup>H NMR spectra on a Bruker AV400 spectrometer.

## 9. Quantum yield measurement

The rate of photon flux of the light was determined by a potassium ferrioxalate (K<sub>3</sub>[Fe(C<sub>2</sub>O<sub>4</sub>)<sub>3</sub>]) actinometer.<sup>8</sup> The incident light intensity was determined to be  $1.519 \times 10^{-7}$  einstein s<sup>-1</sup> (for 420 nm) and  $1.137 \times 10^{-7}$  einstein s<sup>-1</sup> (for 400 nm).<sup>1</sup>

3.0 mL of CH<sub>3</sub>CN solution containing 1 mg Fe-bpy-COF, 0.4 mM pySH, 1.5 M H<sub>2</sub>O and 0.025 M BIH was degassed by freeze-pump-thaw cycles and CO<sub>2</sub> was introduced. After irradiation for 1 h at 20 °C with a 300 W Xe lamp equipped with a 400 nm band pass filter, the amount of the generated CO during catalysis was determined by GC and the amount of HCOO<sup>-</sup> was determined by <sup>1</sup>H NMR on a Bruker AV400 spectrometer. Quantum yield of the reaction was calculated by following equation:

$$\Phi(\%) = \frac{\text{moles}_{CO \text{ or } HCOO^-} \times 2}{\text{incident photons}} \times 100\%$$

It can be found the amount of the generated CO and HCOO<sup>-</sup> was 0.25 μmol and 1.05 μmol respectively after 1 h of irradiation under 420 nm light. And the generated CO and HCOO<sup>-</sup> was 1.07 μmol and 2.56 μmol respectively after 1 h of irradiation under 400 nm light. The quantum yield was estimated to be  $\Phi_{CO} = 0.09\%$  and  $\Phi_{HCOO^-} = 0.38\%$  under 420 nm light. The quantum yield was estimated to be  $\Phi_{CO} = 0.52\%$  and  $\Phi_{HCOO^-} = 1.25\%$  under 400 nm light.

## 10. Supplementary figures and tables

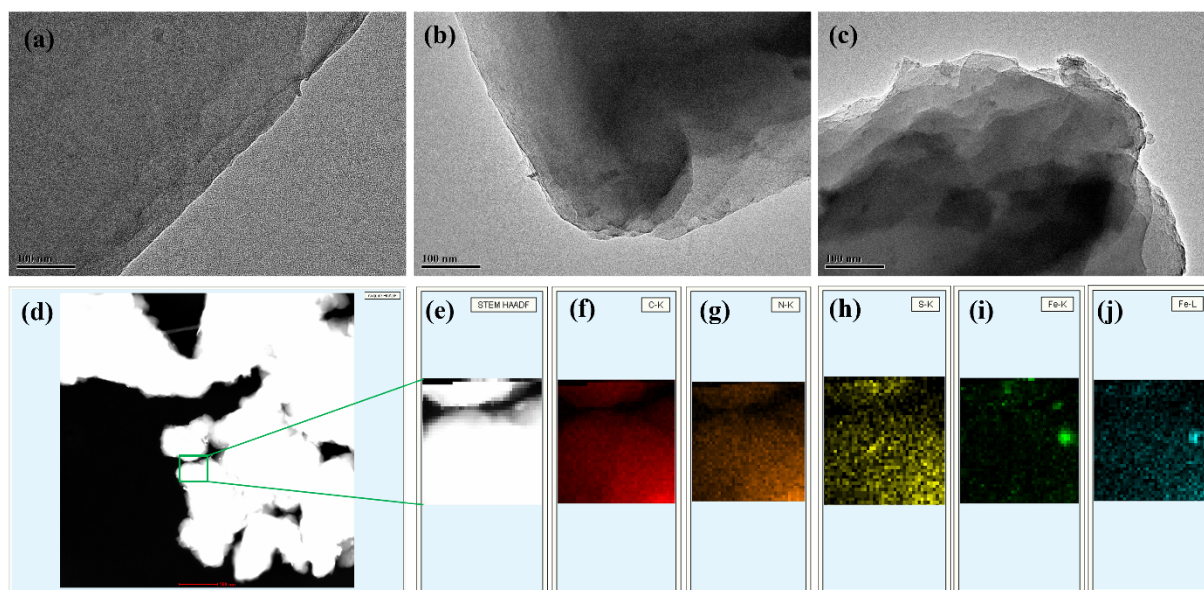

Figure S1. TEM image of (a) bpy-COF, (b) Fe-bpy-COF, (c) FeS-bpy-COF, and (d-j) element mapping of FeS-bpy-COF.

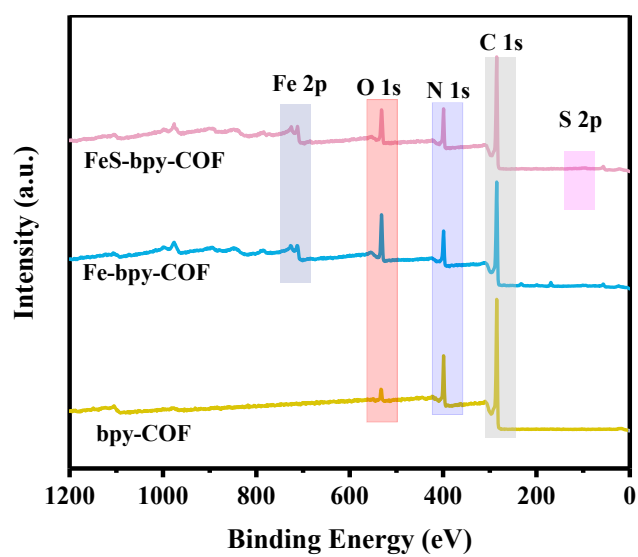

Figure S2. The total XPS profiles of bpy-COF, Fe-bpy-COF and FeS-bpy-COF.

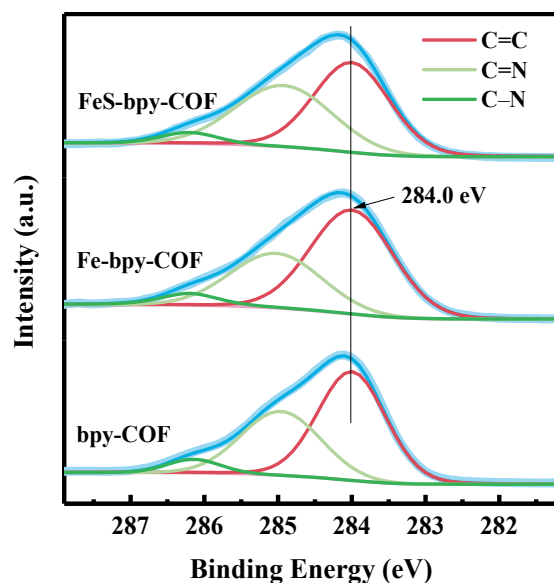

Figure S3. C 1s XPS spectra of bpy-COF, Fe-bpy-COF and FeS-bpy-COF.

Table S1. N<sub>2</sub> and CO<sub>2</sub> physisorption results of bpy-COF and FeS-bpy-COF.

| Sample       | $S_{\text{BET}}$<br>( $\text{m}^2 \text{g}^{-1}$ ) | $V_{\text{total}}$<br>( $\text{cm}^3 \text{g}^{-1}$ ) | $V_{\text{micro}}$<br>( $\text{cm}^3 \text{g}^{-1}$ ) | CO <sub>2</sub> ( $\text{cm}^3 \text{g}^{-1}$ ) |       | $Q_{\text{st}}$ ( $\text{kJ mol}^{-1}$ ) |
|--------------|----------------------------------------------------|-------------------------------------------------------|-------------------------------------------------------|-------------------------------------------------|-------|------------------------------------------|
|              |                                                    |                                                       |                                                       | 0 °C                                            | 25 °C |                                          |
| bpy- COF     | 173.7                                              | 0.191                                                 | 0.062                                                 | 10.6                                            | 5.3   | 28.4                                     |
| FeS-bpy- COF | 123.3                                              | 0.170                                                 | 0.025                                                 | 9.7                                             | 6.6   | 20.1                                     |

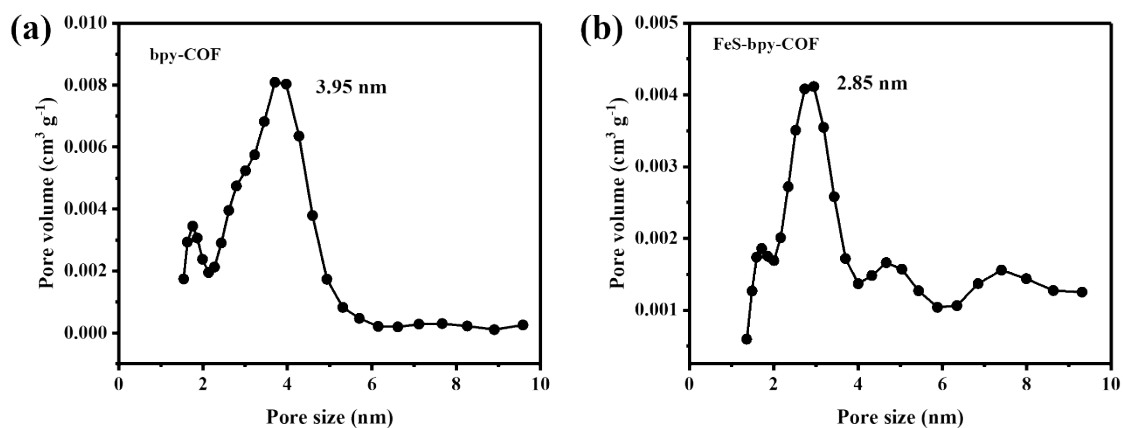

Figure S4. Pore size distribution profile (a) bpy-COF, (b) FeS-bpy-COF



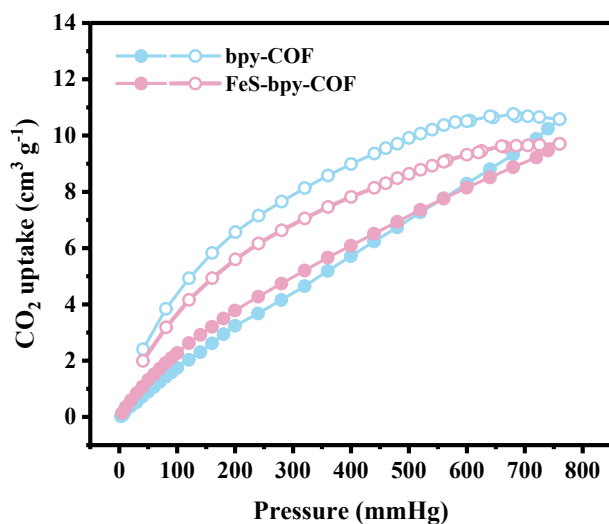

Figure S5. CO<sub>2</sub> adsorption isotherm patterns at 0 °C

**Table S2.** Elemental analysis experimental and predictive results

| Sample      | Mass percentage of different elements (%) |       |      |
|-------------|-------------------------------------------|-------|------|
|             | N                                         | C     | H    |
| bpy-COF     | 18.38                                     | 70.44 | 4.70 |
| Fe-bpy-COF  | 17.77                                     | 65.54 | 4.39 |
| FeS-bpy-COF | 17.53                                     | 66.56 | 4.03 |

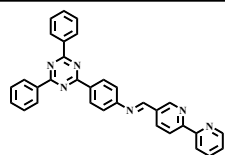

Elemental Analysis: C, 78.35; H, 4.52; N, 17.13

**bpy-COF**

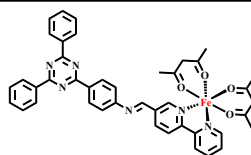

Elemental Analysis: C, 67.56; H, 5.13; Fe, 7.48; N, 11.26; O, 8.57

**Fe-bpy-COF**

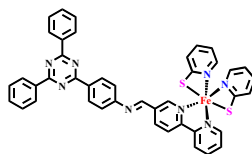

Elemental Analysis: C, 65.79; H, 3.94; Fe, 7.28; N, 14.61; S, 8.36

**FeS-bpy-COF**

**Table S3.** ICP-OES results of Fe-bpy-COF and FeS-bpy-COF.

| Sample      | Fe (wt%) | S (wt%) |
|-------------|----------|---------|
| Fe-bpy-COF  | 2.77     | -       |
| FeS-bpy-COF | 2.41     | 0.375   |

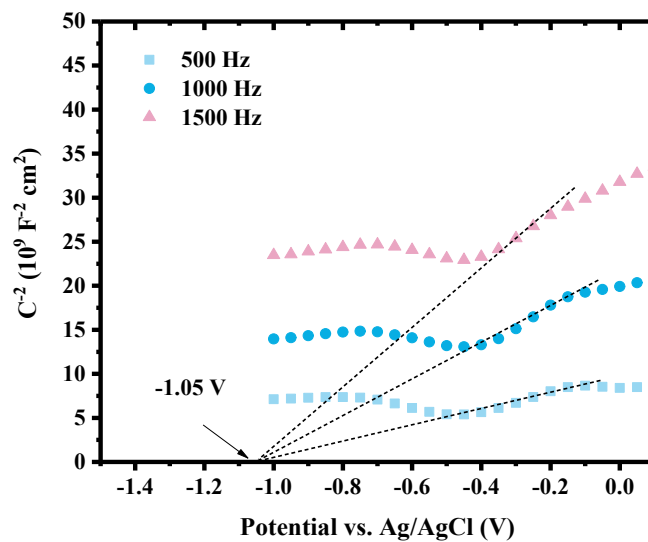

Figure S6. Mott-Schottky plots of bpy-COF.

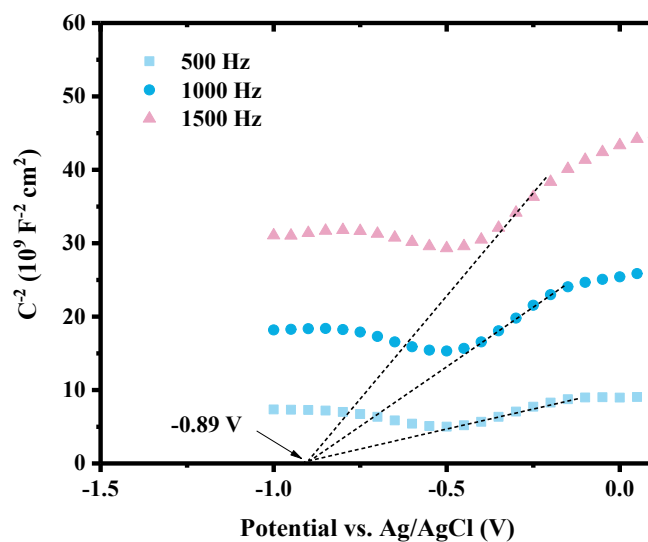

Figure S7. Mott-Schottky plots of Fe-bpy-COF.

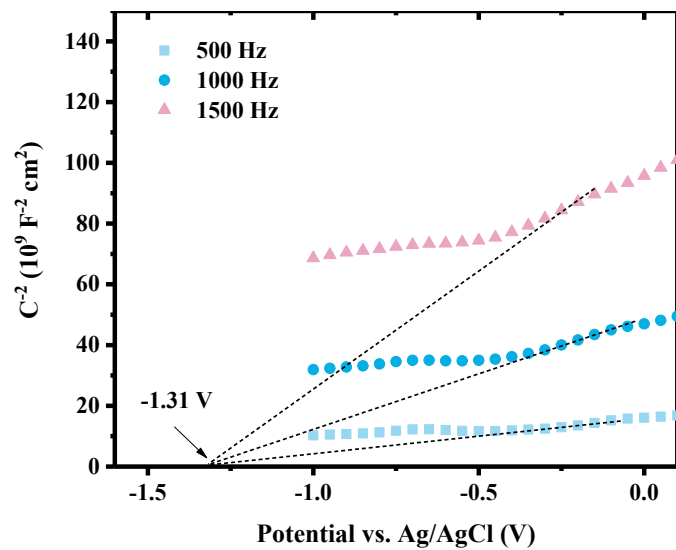

Figure S8. Mott-Schottky plots of FeS-bpy-COF.

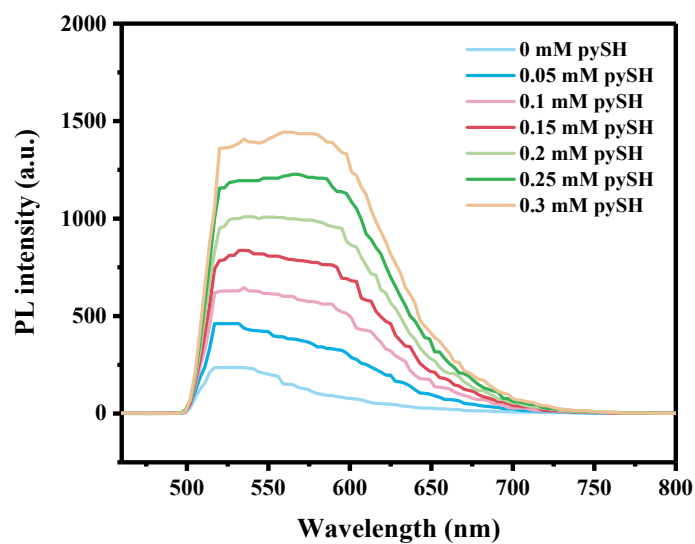

Figure S9. PL spectra of different pySH concentrations in  $\text{CH}_3\text{CN}$  (Ex: 440 nm, with 510nm filter).

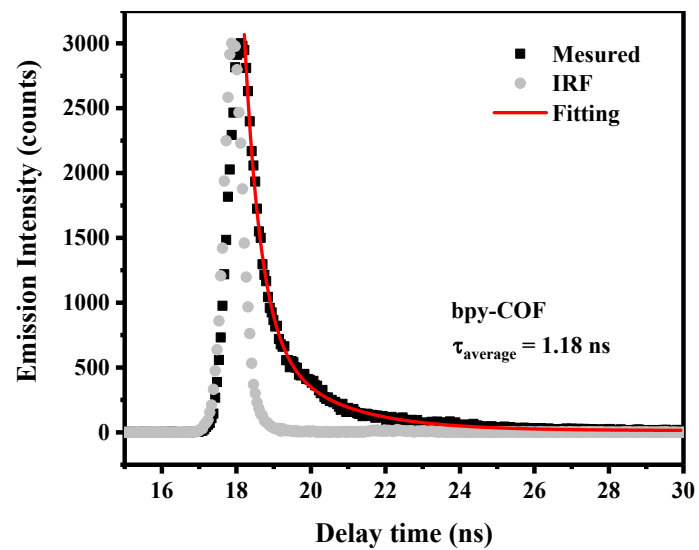

Figure S10. Time-resolved photoluminescence decay spectra of bpy-COF with 450 nm laser.

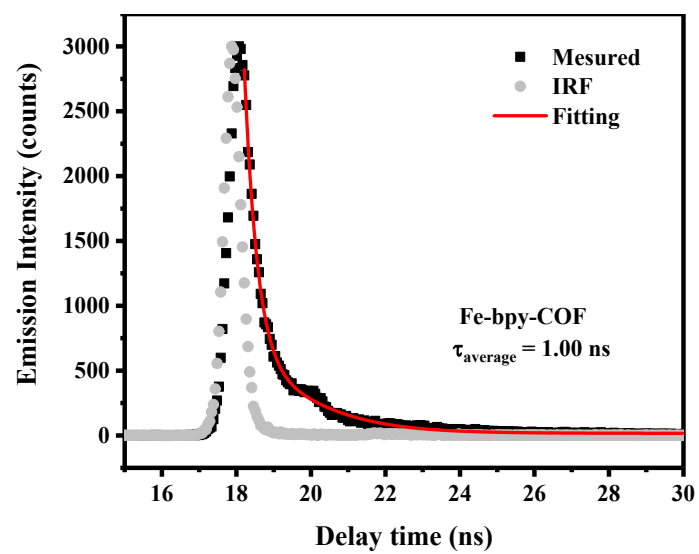

Figure S11. Time-resolved photoluminescence decay spectra of Fe-bpy-COF with 450 nm laser.

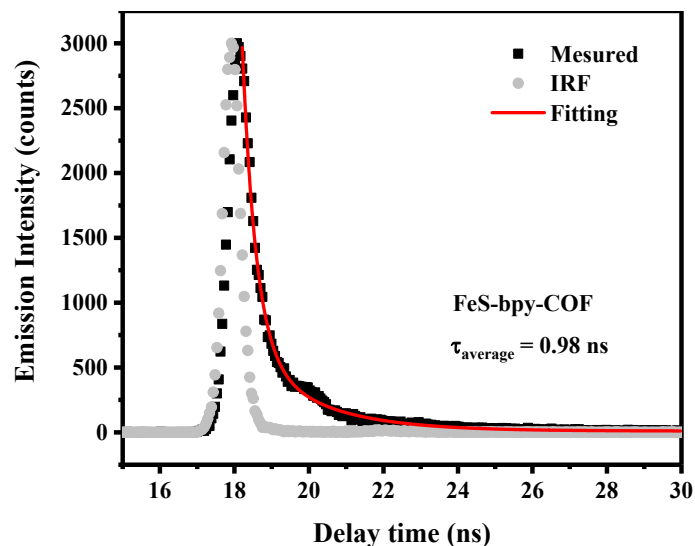

Figure S12. Time-resolved photoluminescence decay spectra of FeS-bpy-COF with 450 nm laser.

Table S4. Fluorescence lifetime test results

| Sample      | Lifetime(ns)    | Coefficient   | Lifetime average(ns)           |
|-------------|-----------------|---------------|--------------------------------|
| bpy-COF     | $\tau_1 = 0.44$ | $A_1 = 0.145$ | $\tau_{\text{average}} = 1.18$ |
|             | $\tau_2 = 2.53$ | $A_2 = 0.014$ |                                |
| Fe-bpy-COF  | $\tau_1 = 0.31$ | $A_1 = 0.190$ | $\tau_{\text{average}} = 1.00$ |
|             | $\tau_2 = 2.15$ | $A_2 = 0.017$ |                                |
| FeS-bpy-COF | $\tau_1 = 0.31$ | $A_1 = 0.184$ | $\tau_{\text{average}} = 0.98$ |
|             | $\tau_2 = 2.08$ | $A_2 = 0.017$ |                                |

Table S5. The fitting parameters for the kinetic traces at 610 nm in fs-TA

| Sample      | $\tau_1$ , ps ( $A_1$ ,%) | $\tau_2$ , ps ( $A_2$ ,%) | $\tau_3$ , ps ( $A_3$ ,%) | $\tau_{\text{avg}}$ , ps |
|-------------|---------------------------|---------------------------|---------------------------|--------------------------|
| bpy-COF     | 1.32(65.7)                | 24.3 (18.3)               | 1990 (16.0)               | 323.71                   |
| Fe-bpy-COF  | 1.09 (63.3)               | 19.2 (24.6)               | 2440 (12.1)               | 300.65                   |
| FeS-bpy-COF | 1.10 (46.8)               | 23.7 (37.3)               | 2550 (15.9)               | 414.80                   |

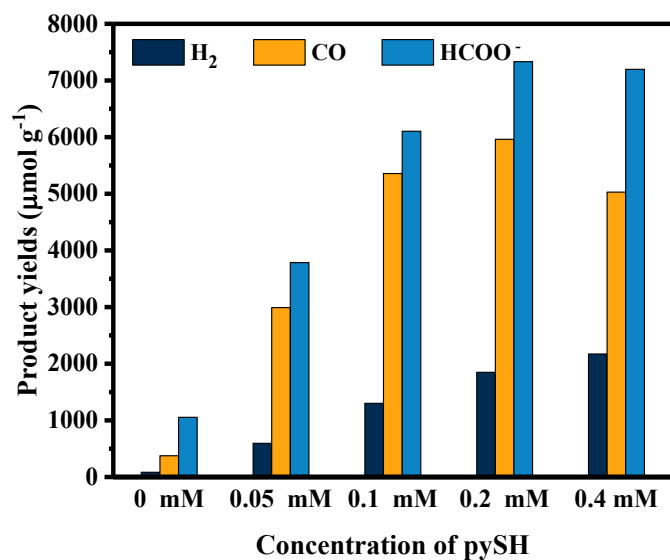

Figure S13. The product yields catalyzed by FeS-bpy-COF with additional different concentrations of pySH.

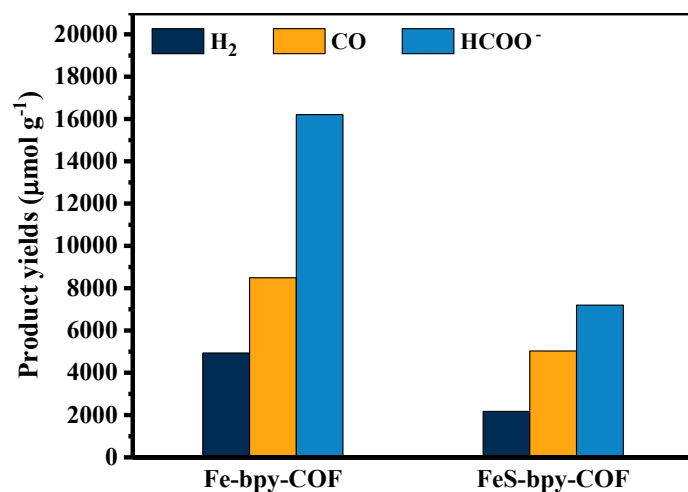

Figure S14. The product yields catalyzed by Fe-bpy-COF or FeS-bpy-COF with additional 0.4 mM pySH.

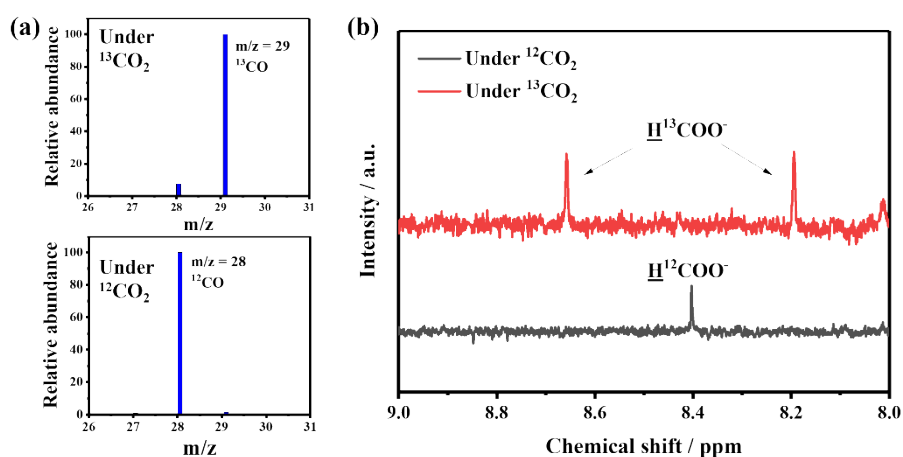

Figure S15. Isotopic labeling experiment (a) Mass spectra of CO<sub>2</sub>, and (b) <sup>1</sup>H NMR spectra of HCOO<sup>-</sup> generated under <sup>12</sup>CO<sub>2</sub> or <sup>13</sup>CO<sub>2</sub>.

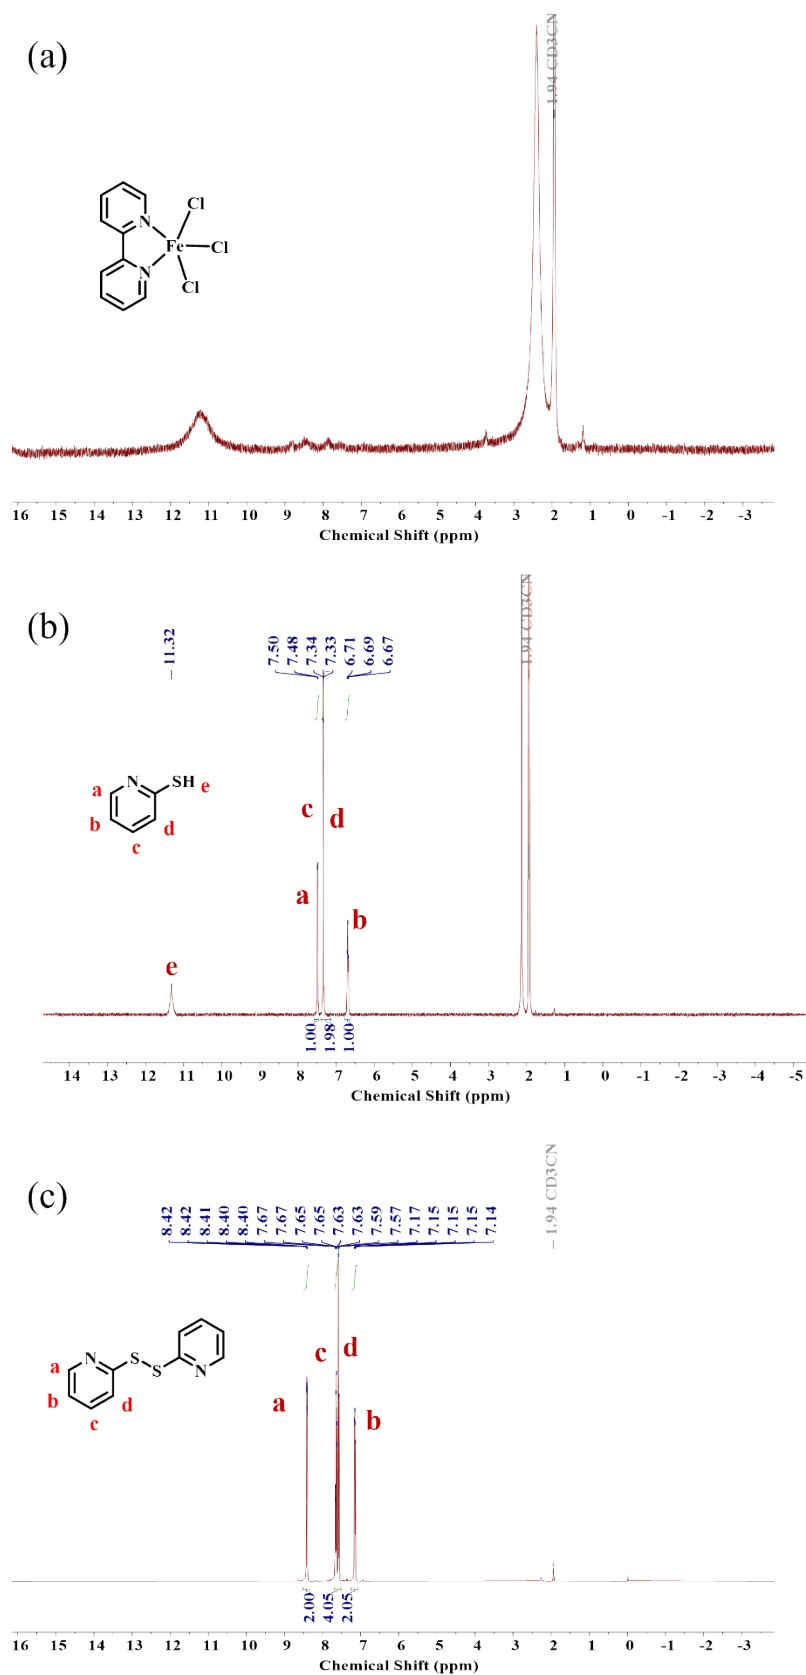

Figure S16.  $^1\text{H}$  NMR spectra in  $\text{CD}_3\text{CN}$ , (a)  $\text{Fe}(\text{bpy})\text{Cl}_3$ , (b) pySH, (c) pyS-Spy.

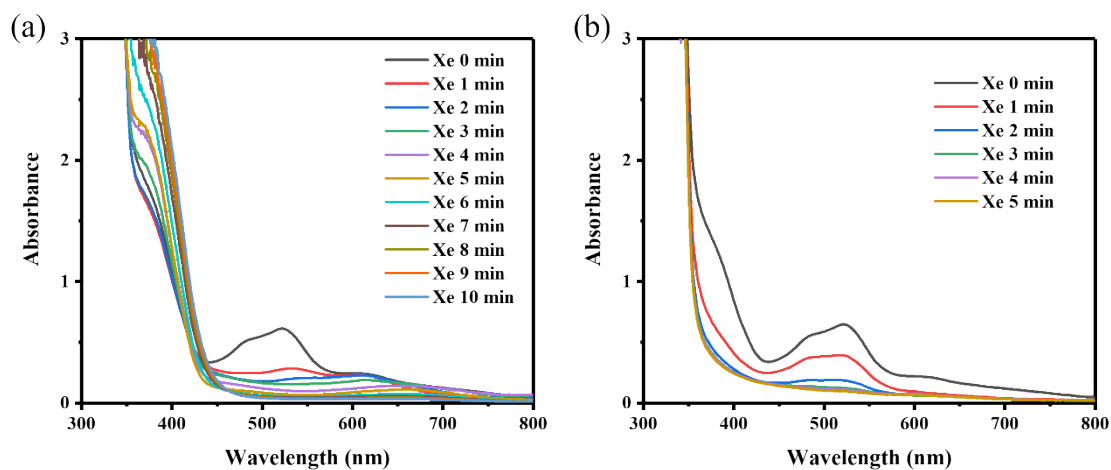

Figure S17. Steady-state measurements of absorption spectral in CH<sub>3</sub>CN solution containing 0.2 mM FebpyCl<sub>3</sub>, 0.4 mM pySH, 0.025 M BIH and 1.5 M H<sub>2</sub>O upon photo-irradiation under (a) CO<sub>2</sub> and (b) Ar.

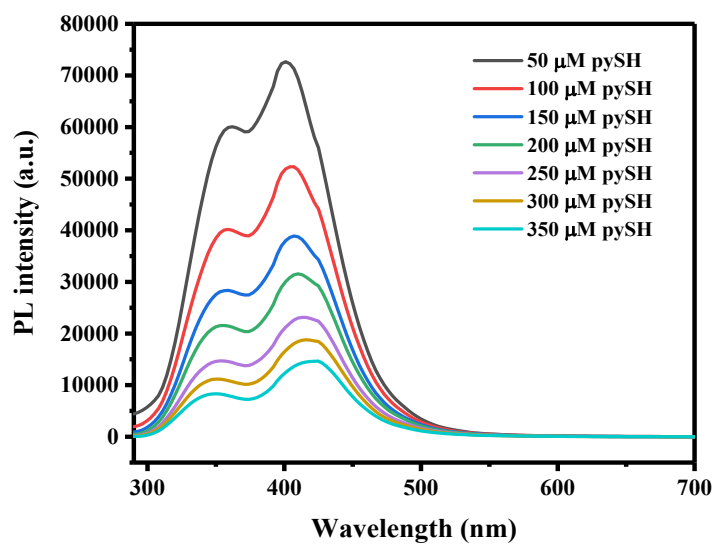

Figure S18. PL spectra of different pySH concentrations in CH<sub>3</sub>CN (Ex: 270 nm).



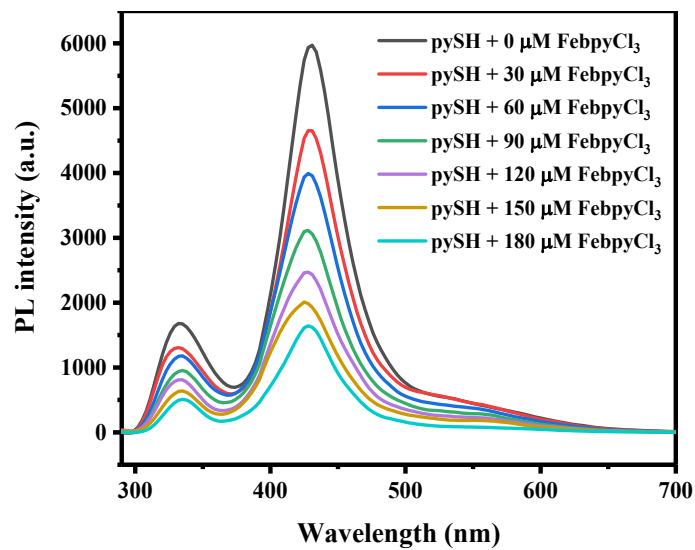

Figure S19. PL spectra of 0.6 mM pySH with different FebpyCl<sub>3</sub> concentrations in CH<sub>3</sub>CN (Ex: 270 nm).

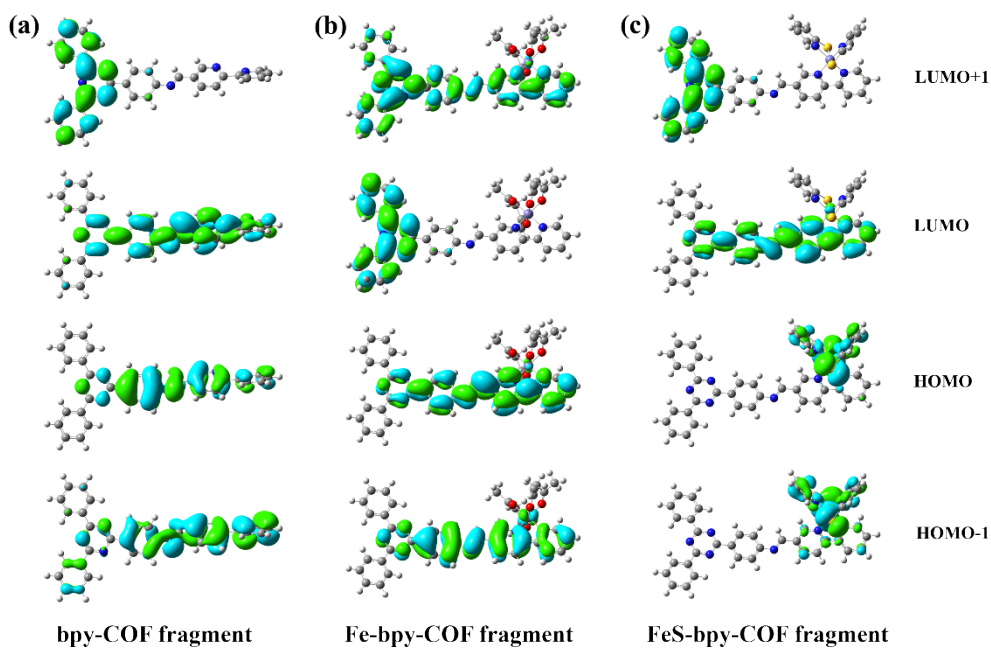

Figure S20. Frontier molecular orbitals of (a) bpy-COF fragment; (b) Fe-bpy-COF fragment; (c) FeS-bpy-COF fragment.

**Table S6.** Transferred electrons between fragments

| Donor fragment | Acceptor fragment |              |              |       |
|----------------|-------------------|--------------|--------------|-------|
|                | 1                 | 2            | 3            | 4     |
| 1              | 0.004             | <b>0.012</b> | 0.216        | 0.080 |
| 2              | 0.009             | 0.026        | <b>0.456</b> | 0.170 |
| 3              | 0.000             | 0.000        | 0.018        | 0.007 |
| 4              | 0.000             | 0.000        | 0.000        | 0.000 |

**Table S7.** Variation of different fragments population number

| Fragment                       | 1      | 2      | 3     | 4     |
|--------------------------------|--------|--------|-------|-------|
| Variation of population number | -0.298 | -0.621 | 0.664 | 0.256 |

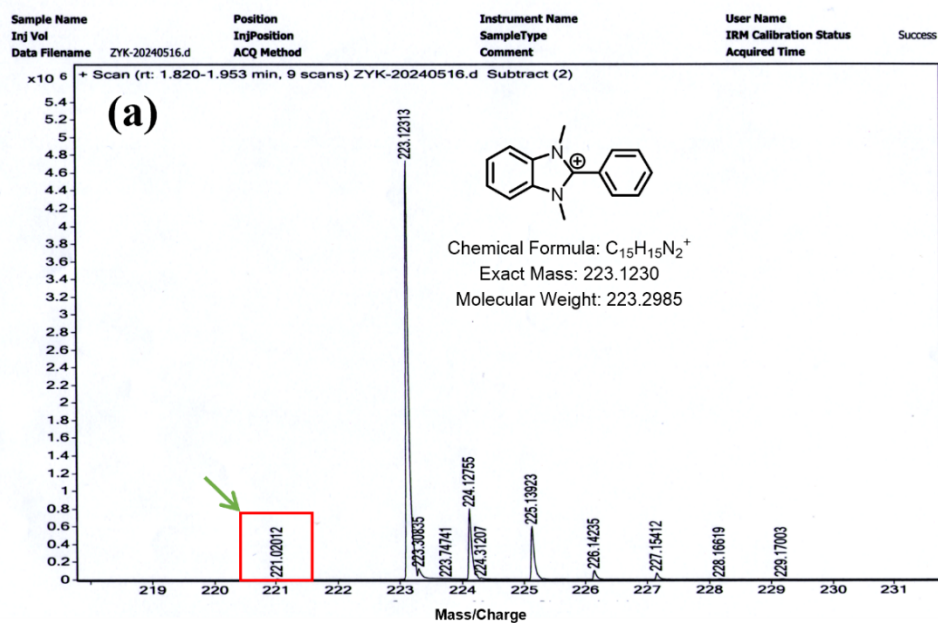

| Sample Name   | Position    | Instrument Name | User Name              |
|---------------|-------------|-----------------|------------------------|
| Inj Vol       | InjPosition | SampleType      | IRM Calibration Status |
| Data Filename | ACQ Method  | Comment         | Success                |

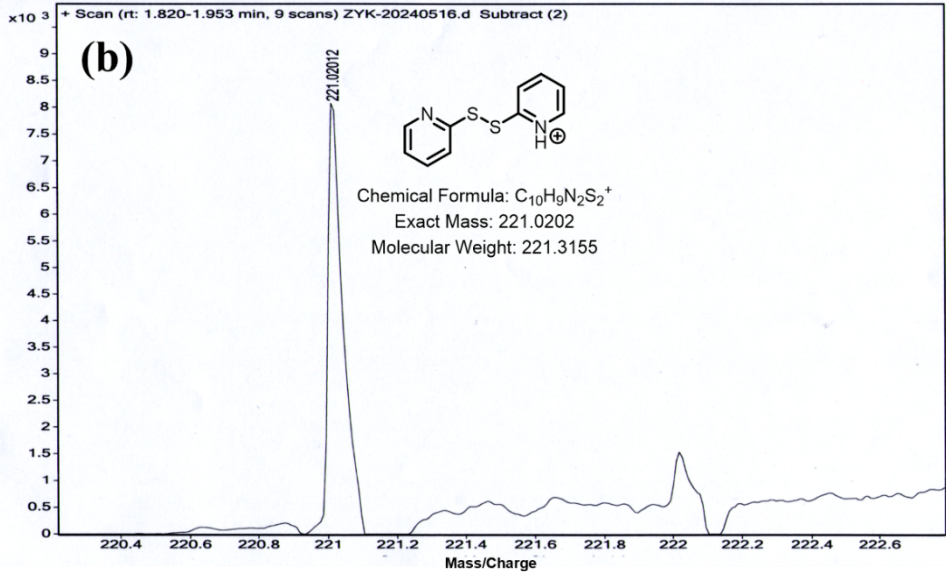

| Sample Name   | Position    | Instrument Name | User Name              |
|---------------|-------------|-----------------|------------------------|
| Inj Vol       | InjPosition | SampleType      | IRM Calibration Status |
| Data Filename | ACQ Method  | Comment         | Success                |

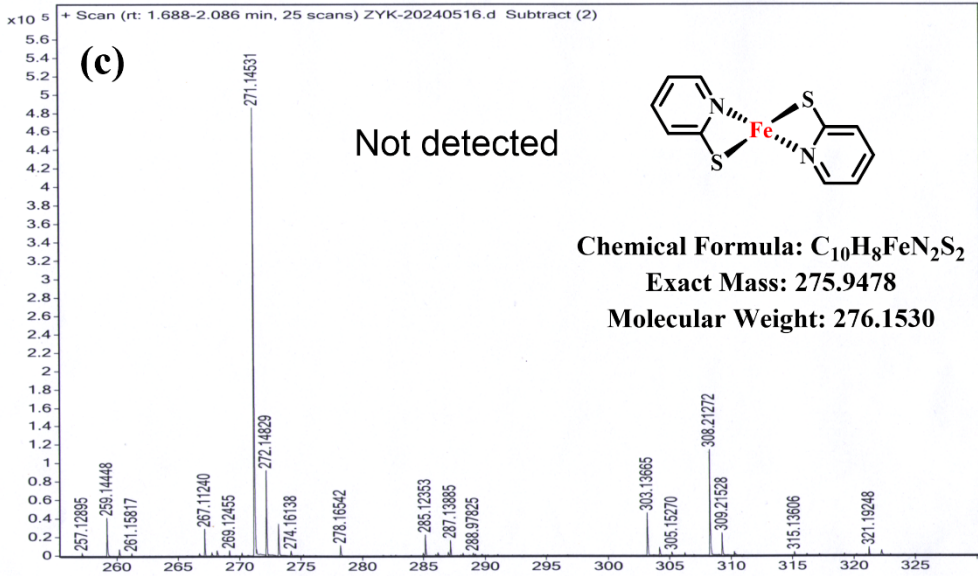

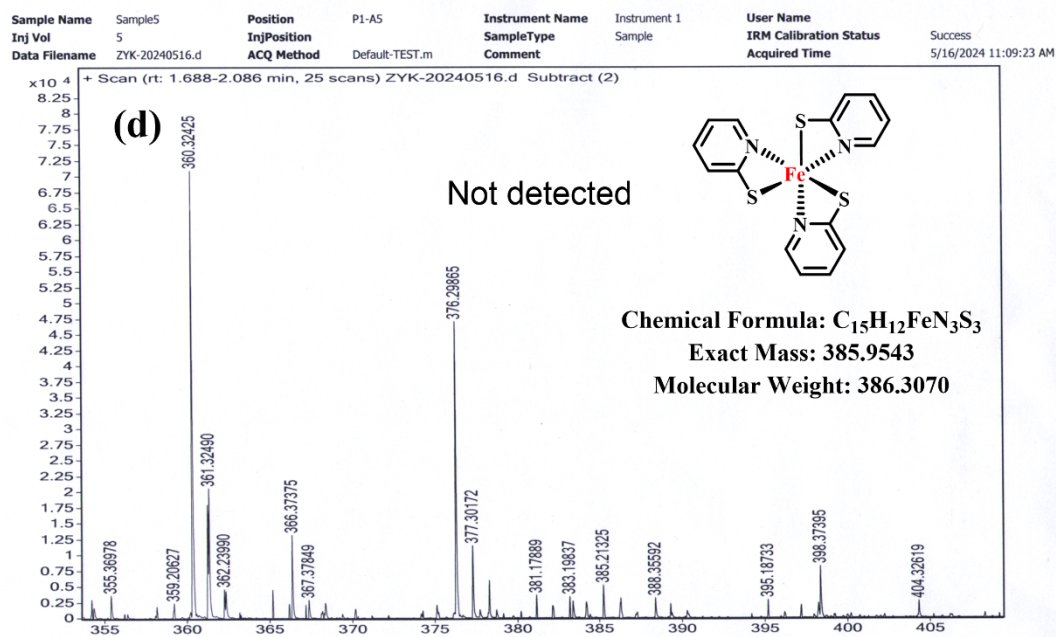

Figure S21. High-resolution mass spectrometry results of the solution after 1h reaction for Fe-bpy-COF with 2 mM pySH system. (a) Mass spectra of  $m/z$  from 218 to 232; (b) View of the mass spectrometry with localized zoom in the red box; (c) Mass spectra of  $m/z$  from 255 to 330; (d) Mass spectra of  $m/z$  from 353 to 410.

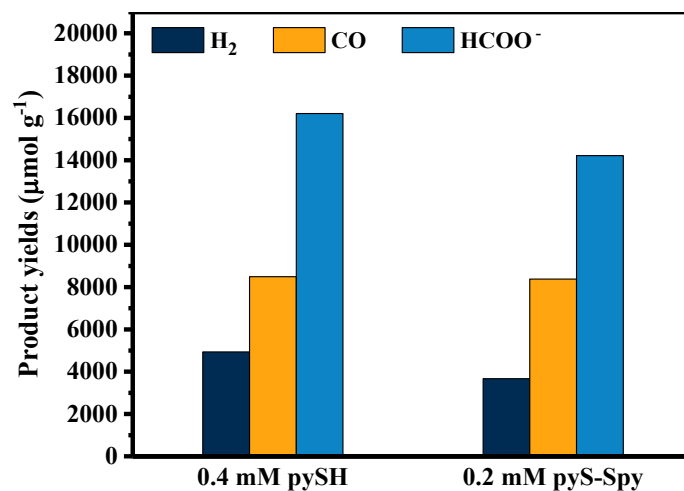

Figure S22. The product yields catalyzed by Fe-bpy-COF with additional 0.4 mM pySH or 0.2 mM pyS-Spy.

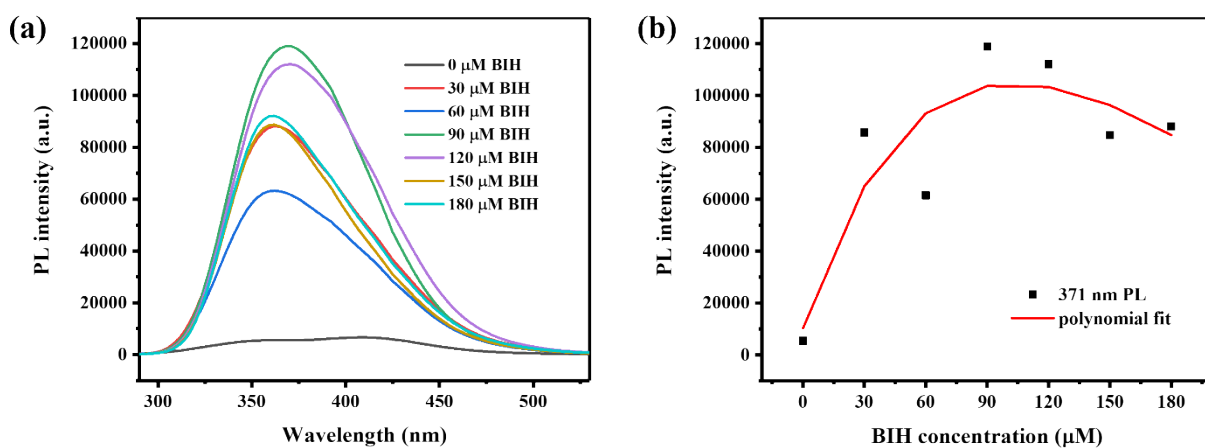

Figure S23. (a) PL spectra of 0.3 mM pyS-Spy with different BIH concentrations in  $\text{CH}_3\text{CN}$  (Ex: 270 nm). (b) The relationship between PL intensity at 371 nm and BIH concentration fitted by polynomial method

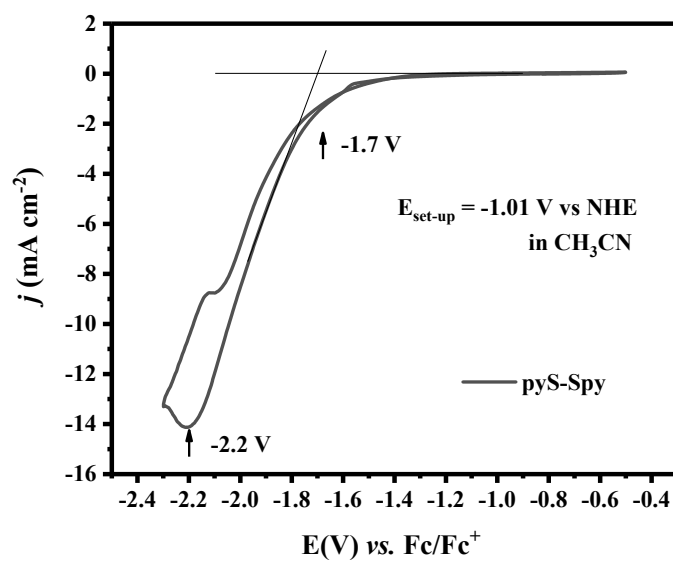

Figure S24. Cyclic voltammograms of 20 mM pyS-Spy in  $\text{CH}_3\text{CN}$  solution containing 0.1 M  $\text{TBAPF}_6$  at scan rate 0.1 V/s under argon.

**Table S8.** BDE values obtained by theoretical calculations for BIH and thiol ligands.

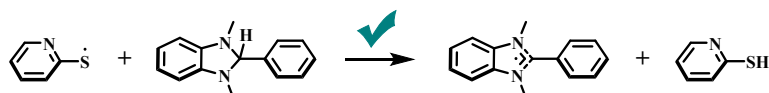

| Entry | abbreviation          | $\Delta H$ kcal/mol | Entry | abbreviation          | $\Delta H$ kcal/mol |
|-------|-----------------------|---------------------|-------|-----------------------|---------------------|
| 1     | pySH                  | 88.4                | 8     | CF <sub>3</sub> -pySH | 90.2                |
| 2     | CH <sub>3</sub> -pySH | 84.9                | 9     | CH <sub>3</sub> -phSH | 78.6                |
| 3     | NH <sub>2</sub> -pySH | 91.0                | 10    | NO-pySH               | 87.0                |
| 4     | COOH-pySH             | 83.8                | 11    | NO-pyOH               | 69.9                |
| 5     | Cl-pySH               | 85.8                | 12    | 4-pySH                | 86.8                |
| 6     | CN-pySH               | 88.2                | 13    | 2-phOHSH              | 80.5                |
| 7     | NO <sub>2</sub> -pySH | 88.4                | /     | BIH                   | 71.5                |

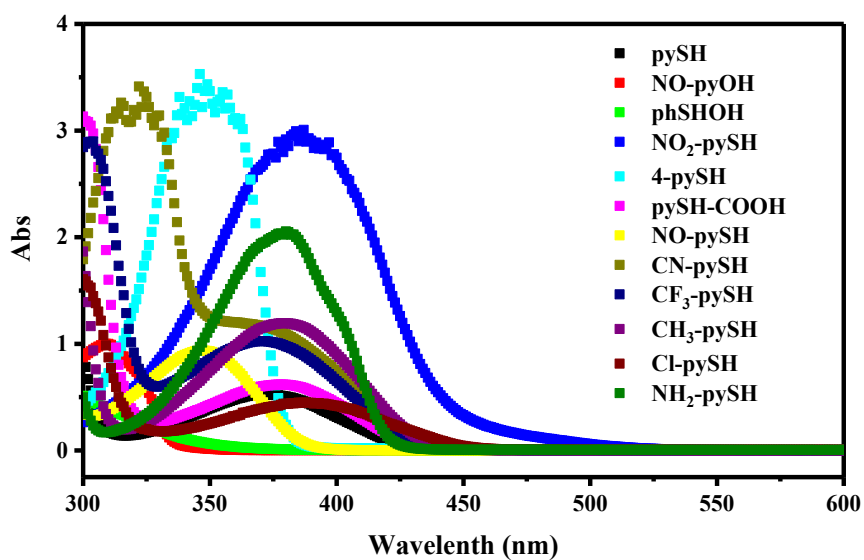

Figure S25. UV-vis spectra of 0.2 mM pySH with different substituents in CH<sub>3</sub>CN.

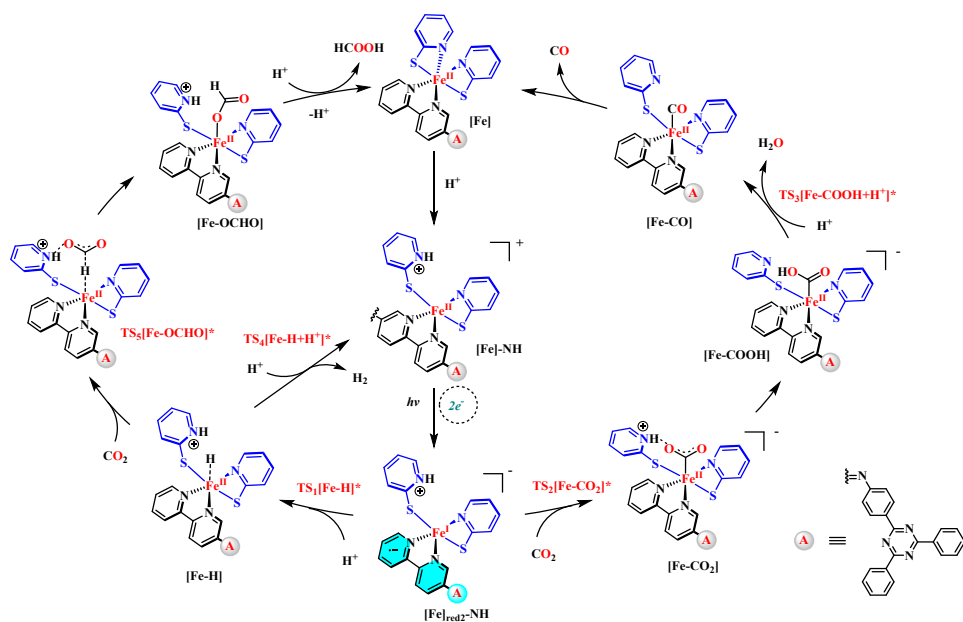

Scheme S1. Proposed catalytic mechanism for photocatalytic CO<sub>2</sub> reduction by FeS-bpy-COF.

## 11. The coordinates of transition states in DFT calculation (in xyz format)

TS<sub>1</sub>[Fe-H]\*

-1 3

|    |           |           |           |
|----|-----------|-----------|-----------|
| C  | -5.456113 | -2.792417 | -0.859482 |
| C  | -7.609650 | -1.903879 | -0.575150 |
| C  | -8.213991 | -3.045704 | -1.089872 |
| C  | -7.385164 | -4.106039 | -1.500332 |
| C  | -6.008813 | -3.983981 | -1.386772 |
| C  | -4.045750 | -2.531610 | -0.699057 |
| C  | -2.475751 | -0.927701 | -0.008691 |
| C  | -1.371420 | -1.749943 | -0.342590 |
| C  | -1.682179 | -3.041547 | -0.881631 |
| C  | -2.995115 | -3.415415 | -1.054454 |
| H  | -8.205036 | -1.052855 | -0.236949 |
| H  | -7.820276 | -5.022165 | -1.907472 |
| H  | -5.355121 | -4.798090 | -1.700779 |
| H  | -2.310826 | 0.069888  | 0.405795  |
| H  | -0.865041 | -3.712171 | -1.152488 |
| H  | -3.233327 | -4.394987 | -1.471701 |
| N  | -3.737663 | -1.294350 | -0.167993 |
| N  | -6.281465 | -1.778168 | -0.461151 |
| Fe | -5.289253 | -0.188908 | 0.336573  |
| C  | -6.874234 | 0.139318  | 2.376374  |
| C  | -7.865053 | 0.486727  | 3.312848  |
| C  | -8.832941 | 1.414889  | 2.939742  |
| C  | -8.808616 | 1.977849  | 1.652281  |
| C  | -7.799008 | 1.590123  | 0.777804  |
| N  | -6.861077 | 0.703704  | 1.143107  |
| H  | -9.614872 | 1.700951  | 3.648208  |
| H  | -7.863298 | 0.026365  | 4.302641  |
| H  | -9.561182 | 2.700077  | 1.331958  |
| H  | -7.733184 | 1.978462  | -0.241149 |
| C  | -5.081517 | 4.424427  | 0.020297  |
| C  | -5.287832 | 5.342347  | -0.985255 |
| C  | -5.485107 | 4.857977  | -2.296478 |
| C  | -5.479348 | 3.497606  | -2.555453 |
| C  | -5.276067 | 2.575038  | -1.500573 |
| N  | -5.079688 | 3.102075  | -0.262928 |
| H  | -5.647506 | 5.561645  | -3.116682 |
| H  | -4.914209 | 4.690064  | 1.065353  |
| H  | -5.294217 | 6.409258  | -0.761247 |
| H  | -5.637146 | 3.114872  | -3.564615 |



|   |           |           |           |
|---|-----------|-----------|-----------|
| S | -5.563085 | -1.001206 | 2.536099  |
| S | -5.265949 | 0.862981  | -1.748062 |
| C | 2.294813  | -1.516531 | -0.302211 |
| C | 3.361284  | -2.457384 | -0.246373 |
| C | 2.651584  | -0.135488 | -0.282722 |
| C | 4.682740  | -2.056335 | -0.145429 |
| H | 3.104165  | -3.519465 | -0.275537 |
| C | 3.976661  | 0.260543  | -0.191493 |
| H | 1.876330  | 0.628744  | -0.366877 |
| C | 5.027495  | -0.683532 | -0.113131 |
| H | 5.475570  | -2.804104 | -0.093334 |
| H | 4.221276  | 1.324021  | -0.187745 |
| C | 6.426817  | -0.253871 | -0.015859 |
| C | 8.646931  | -0.763252 | 0.149393  |
| C | 7.984686  | 1.413623  | 0.074861  |
| C | 8.321304  | 2.864037  | 0.080894  |
| C | 9.660315  | 3.286613  | 0.175485  |
| C | 7.305266  | 3.833922  | -0.007951 |
| C | 9.974589  | 4.646905  | 0.181378  |
| H | 10.451145 | 2.538819  | 0.244601  |
| C | 7.622054  | 5.193316  | -0.002050 |
| H | 6.266163  | 3.510926  | -0.082032 |
| C | 8.957210  | 5.604423  | 0.092612  |
| H | 11.018667 | 4.962009  | 0.255600  |
| H | 6.823554  | 5.936607  | -0.071911 |
| C | 9.733770  | -1.776837 | 0.241518  |
| C | 9.431138  | -3.151305 | 0.247534  |
| C | 11.079969 | -1.375053 | 0.324366  |
| C | 10.451196 | -4.100195 | 0.334279  |
| H | 8.389232  | -3.467373 | 0.184391  |
| C | 12.098437 | -2.326064 | 0.410752  |
| H | 11.319222 | -0.311022 | 0.320304  |
| C | 11.787791 | -3.691079 | 0.415956  |
| H | 10.202916 | -5.164731 | 0.338275  |
| H | 13.140130 | -2.000927 | 0.474401  |
| C | -0.040246 | -1.274434 | -0.140476 |
| H | 0.045456  | -0.254770 | 0.274528  |
| H | 12.586051 | -4.435093 | 0.483867  |
| H | 9.204157  | 6.669464  | 0.097233  |
| N | 6.699210  | 1.065707  | -0.010856 |
| N | 8.993482  | 0.532806  | 0.156566  |
| N | 7.387081  | -1.195630 | 0.064379  |
| N | 1.017362  | -2.009181 | -0.402059 |
| H | -9.300879 | -3.104387 | -1.165746 |

|   |           |          |          |
|---|-----------|----------|----------|
| H | -4.893350 | 2.407709 | 0.485257 |
| H | -4.462947 | 0.946190 | 0.961570 |

Thermal correction to Gibbs Free Energy= 0.5675870 (A.U.)

Electronic Energy= -4194.9069420 (A.U.)

The number of imaginary frequencies: 1

**TS<sub>2</sub>[Fe-CO<sub>2</sub>]\***

-1 1

|    |           |           |           |
|----|-----------|-----------|-----------|
| C  | -7.413643 | -0.625363 | -2.073837 |
| N  | -6.140078 | -0.711437 | -1.647239 |
| C  | -5.361196 | -1.758220 | -2.076195 |
| C  | -5.916605 | -2.783704 | -2.878500 |
| C  | -7.238393 | -2.702543 | -3.279924 |
| C  | -8.004166 | -1.589042 | -2.881425 |
| Fe | -5.206274 | 0.596867  | -0.507795 |
| N  | -3.620498 | -0.476427 | -1.115052 |
| C  | -2.341274 | -0.244591 | -0.841258 |
| C  | -1.294559 | -1.141403 | -1.132455 |
| C  | -1.663762 | -2.410508 | -1.678936 |
| C  | -2.989176 | -2.666823 | -1.938777 |
| C  | -3.974790 | -1.673449 | -1.703028 |
| S  | -4.997998 | -0.937134 | 1.341707  |
| C  | -6.156510 | -1.115026 | 2.571138  |
| N  | -7.282263 | -0.338842 | 2.707927  |
| C  | -8.216558 | -0.497337 | 3.674073  |
| C  | -8.098578 | -1.483232 | 4.621332  |
| C  | -6.949535 | -2.318801 | 4.555410  |
| C  | -6.010757 | -2.138464 | 3.567293  |
| S  | -5.192449 | 2.379526  | -2.045293 |
| C  | -4.159540 | 2.964212  | -0.781552 |
| N  | -4.080422 | 2.047873  | 0.215653  |
| C  | -3.398725 | 2.299799  | 1.334431  |
| C  | -2.692015 | 3.488382  | 1.507673  |
| C  | -2.730614 | 4.441233  | 0.475296  |
| C  | -3.470413 | 4.189458  | -0.676347 |
| H  | -5.125820 | -2.772644 | 3.500402  |
| H  | -6.810442 | -3.111549 | 5.295680  |
| H  | -8.859931 | -1.607175 | 5.391460  |
| H  | -9.047192 | 0.210292  | 3.635592  |
| H  | -3.537240 | 4.913645  | -1.490264 |
| H  | -2.187235 | 5.385235  | 0.579721  |
| H  | -2.134661 | 3.668412  | 2.428749  |
| H  | -3.433444 | 1.516952  | 2.096571  |

|   |           |           |           |
|---|-----------|-----------|-----------|
| H | -2.120722 | 0.706927  | -0.352308 |
| H | -0.880583 | -3.146817 | -1.865055 |
| H | -3.290669 | -3.637247 | -2.338221 |
| H | -5.289418 | -3.616311 | -3.199966 |
| H | -7.673843 | -3.485531 | -3.907052 |
| H | -9.050243 | -1.481177 | -3.175033 |
| H | -7.957666 | 0.234741  | -1.679927 |
| C | -6.758901 | 1.555659  | 0.565792  |
| O | -6.467299 | 2.177484  | 1.590941  |
| O | -7.863605 | 1.199162  | 0.120370  |
| H | -7.394924 | 0.456698  | 2.067215  |
| C | 0.060737  | -0.776864 | -0.834596 |
| H | 0.199075  | 0.235628  | -0.408759 |
| N | 1.062650  | -1.592543 | -1.010590 |
| C | 2.366969  | -1.221526 | -0.803148 |
| C | 2.853815  | 0.118627  | -0.798304 |
| C | 3.324449  | -2.256060 | -0.614054 |
| C | 4.194379  | 0.392984  | -0.589001 |
| H | 2.165065  | 0.943691  | -0.991408 |
| C | 4.661336  | -1.978645 | -0.395263 |
| H | 2.958585  | -3.285159 | -0.636443 |
| C | 5.134699  | -0.643220 | -0.373184 |
| H | 4.550570  | 1.424281  | -0.596847 |
| H | 5.375717  | -2.788099 | -0.239200 |
| C | 6.544644  | -0.345592 | -0.149824 |
| C | 8.242546  | 1.168618  | 0.064050  |
| C | 8.681431  | -1.051423 | 0.245407  |
| C | 8.713110  | 2.582535  | 0.075268  |
| C | 7.805587  | 3.637032  | -0.127067 |
| C | 10.069951 | 2.881672  | 0.288317  |
| C | 8.246600  | 4.960855  | -0.116437 |
| H | 6.754944  | 3.394886  | -0.291233 |
| C | 10.508788 | 4.206870  | 0.298444  |
| H | 10.766470 | 2.057265  | 0.444549  |
| C | 9.599449  | 5.250888  | 0.096236  |
| H | 7.531074  | 5.772185  | -0.274844 |
| H | 11.566777 | 4.427358  | 0.465179  |
| H | 9.943802  | 6.288814  | 0.104379  |
| C | 9.651306  | -2.162210 | 0.463355  |
| C | 11.013055 | -1.888978 | 0.679220  |
| C | 9.216510  | -3.499047 | 0.455952  |
| C | 11.919723 | -2.930769 | 0.883159  |
| H | 11.340819 | -0.848898 | 0.683231  |
| C | 10.124613 | -4.538721 | 0.660066  |

|   |           |           |           |
|---|-----------|-----------|-----------|
| H | 8.157877  | -3.700253 | 0.287727  |
| C | 11.479323 | -4.258811 | 0.874390  |
| H | 12.976754 | -2.705900 | 1.050098  |
| H | 9.774280  | -5.574412 | 0.652177  |
| H | 12.190081 | -5.074435 | 1.034289  |
| N | 6.948137  | 0.945508  | -0.143619 |
| N | 9.157814  | 0.204763  | 0.265132  |
| N | 7.406058  | -1.370619 | 0.044924  |

Thermal correction to Gibbs Free Energy= 0.5644310 (A.U.)

Electronic Energy= -4307.1042456 (A.U.)

The number of imaginary frequencies: 1

### TS<sub>3</sub>[Fe-COOH+H<sup>+</sup>]\*

-1 1

|    |           |           |           |
|----|-----------|-----------|-----------|
| C  | -5.150906 | -2.364067 | -0.095679 |
| C  | -7.098254 | -1.581333 | 0.904307  |
| C  | -7.807731 | -2.714669 | 0.526838  |
| C  | -7.155274 | -3.702022 | -0.222488 |
| C  | -5.809196 | -3.530616 | -0.518024 |
| C  | -3.719379 | -2.133686 | -0.219256 |
| C  | -1.995700 | -0.727437 | 0.454443  |
| C  | -1.010938 | -1.571792 | -0.081963 |
| C  | -1.439823 | -2.755874 | -0.730694 |
| C  | -2.792345 | -3.033086 | -0.786769 |
| H  | -7.579044 | -0.777175 | 1.454288  |
| H  | -7.688791 | -4.593005 | -0.563432 |
| H  | -5.261521 | -4.293913 | -1.072207 |
| H  | -1.718007 | 0.204197  | 0.952856  |
| H  | -0.693444 | -3.423751 | -1.164035 |
| H  | -3.147166 | -3.944865 | -1.268785 |
| N  | -3.300211 | -0.978393 | 0.376191  |
| N  | -5.816674 | -1.371411 | 0.564833  |
| Fe | -4.809301 | 0.277265  | 0.764519  |
| C  | -3.475419 | 1.631604  | 2.578528  |
| C  | -2.678957 | 2.539131  | 3.315226  |
| C  | -2.040941 | 3.573782  | 2.641720  |
| C  | -2.200124 | 3.711911  | 1.250903  |
| C  | -2.998086 | 2.782178  | 0.586325  |
| N  | -3.584975 | 1.772471  | 1.230797  |
| H  | -1.423418 | 4.287146  | 3.196933  |
| H  | -2.592142 | 2.414056  | 4.396274  |
| H  | -1.726552 | 4.526824  | 0.699851  |

|   |            |           |           |
|---|------------|-----------|-----------|
| H | -3.194775  | 2.824820  | -0.489273 |
| C | -8.351014  | -0.545419 | -2.521035 |
| C | -9.031033  | 0.560396  | -3.038277 |
| C | -8.329450  | 1.769347  | -3.121234 |
| C | -7.013225  | 1.817864  | -2.675620 |
| C | -6.412116  | 0.648966  | -2.151008 |
| N | -7.087196  | -0.513566 | -2.100295 |
| H | -8.812182  | 2.669684  | -3.515764 |
| H | -8.868640  | -1.507161 | -2.420767 |
| H | -10.073930 | 0.474611  | -3.352968 |
| H | -6.437526  | 2.744876  | -2.691300 |
| S | -4.393421  | 0.285830  | 3.153067  |
| S | -4.750020  | 0.705442  | -1.558597 |
| C | 2.664764   | -1.495445 | -0.375369 |
| C | 3.679260   | -2.457614 | -0.158820 |
| C | 3.058291   | -0.151639 | -0.590477 |
| C | 5.015771   | -2.090795 | -0.115965 |
| H | 3.375154   | -3.496555 | -0.015552 |
| C | 4.398860   | 0.209871  | -0.558532 |
| H | 2.297798   | 0.600414  | -0.811455 |
| C | 5.403598   | -0.748102 | -0.313968 |
| H | 5.788683   | -2.838333 | 0.066199  |
| H | 4.692802   | 1.246194  | -0.729621 |
| C | 6.822067   | -0.359474 | -0.277915 |
| C | 9.018619   | -0.914515 | -0.018617 |
| C | 8.438043   | 1.242520  | -0.433087 |
| C | 8.824750   | 2.663236  | -0.648172 |
| C | 10.176768  | 3.047036  | -0.616459 |
| C | 7.841241   | 3.639481  | -0.885275 |
| C | 10.536569  | 4.380149  | -0.818041 |
| H | 10.933195  | 2.283624  | -0.431652 |
| C | 8.203967   | 4.971735  | -1.086349 |
| H | 6.794827   | 3.333474  | -0.907648 |
| C | 9.551954   | 5.346284  | -1.053470 |
| H | 11.590804  | 4.668298  | -0.791311 |
| H | 7.431061   | 5.722638  | -1.269375 |
| C | 10.065121  | -1.941925 | 0.236212  |
| C | 9.707510   | -3.286633 | 0.436663  |
| C | 11.423001  | -1.581013 | 0.279984  |
| C | 10.688839  | -4.249394 | 0.675661  |
| H | 8.651768   | -3.557469 | 0.401341  |
| C | 12.402288  | -2.545960 | 0.519424  |
| H | 11.691497  | -0.535723 | 0.123756  |
| C | 12.038714  | -3.882603 | 0.717883  |

|   |            |           |           |
|---|------------|-----------|-----------|
| H | 10.399671  | -5.292169 | 0.830316  |
| H | 13.455482  | -2.254608 | 0.551777  |
| C | 0.385587   | -1.199064 | 0.035929  |
| H | 0.581078   | -0.245007 | 0.564486  |
| H | 12.806690  | -4.637968 | 0.905568  |
| H | 9.834722   | 6.390682  | -1.210980 |
| N | 7.140781   | 0.932296  | -0.477051 |
| N | 9.415229   | 0.352181  | -0.206854 |
| N | 7.744565   | -1.311185 | -0.045476 |
| N | 1.349766   | -1.925706 | -0.415336 |
| H | -8.867838  | -2.770024 | 0.775130  |
| C | -6.293749  | 1.585522  | 0.968718  |
| O | -7.598962  | 1.257210  | 0.497780  |
| O | -6.214604  | 2.725014  | 1.386754  |
| H | -8.079195  | 2.100493  | 0.602597  |
| O | -9.891109  | -0.446455 | 0.203862  |
| H | -9.013786  | -0.029150 | 0.096304  |
| H | -10.453513 | 0.311599  | 0.407389  |

Thermal correction to Gibbs Free Energy= 0.5887030 (A.U.)

Electronic Energy= -4383.6259088 (A.U.)

The number of imaginary frequencies: 1

#### TS<sub>4</sub>[Fe-H+H<sup>+</sup>]\*

0 1

|   |           |           |           |
|---|-----------|-----------|-----------|
| C | -5.554520 | -2.836540 | -0.966521 |
| C | -7.673420 | -1.973567 | -0.525263 |
| C | -8.292024 | -3.079751 | -1.100414 |
| C | -7.497325 | -4.106784 | -1.622392 |
| C | -6.111776 | -3.980648 | -1.555046 |
| C | -4.113646 | -2.574773 | -0.853666 |
| C | -2.531889 | -1.049771 | -0.093392 |
| C | -1.468206 | -1.841251 | -0.543588 |
| C | -1.774494 | -3.061191 | -1.178603 |
| C | -3.103423 | -3.426368 | -1.331863 |
| H | -8.248710 | -1.149934 | -0.101128 |
| H | -7.950507 | -4.990384 | -2.077021 |
| H | -5.466486 | -4.762523 | -1.956264 |
| H | -2.343476 | -0.095754 | 0.402652  |
| H | -0.967540 | -3.700880 | -1.540113 |
| H | -3.361695 | -4.364895 | -1.822671 |
| N | -3.814437 | -1.399668 | -0.240536 |
| N | -6.335997 | -1.850012 | -0.446723 |

|    |           |           |           |
|----|-----------|-----------|-----------|
| Fe | -5.391997 | -0.369465 | 0.397699  |
| C  | -4.319515 | 0.228737  | 2.726980  |
| C  | -3.667875 | 0.806528  | 3.838297  |
| C  | -3.078892 | 2.059595  | 3.700421  |
| C  | -3.137818 | 2.725508  | 2.463621  |
| C  | -3.794142 | 2.097967  | 1.408045  |
| N  | -4.369434 | 0.893521  | 1.539146  |
| H  | -2.570891 | 2.522070  | 4.551433  |
| H  | -3.636022 | 0.262253  | 4.784557  |
| H  | -2.682626 | 3.707353  | 2.321186  |
| H  | -3.859992 | 2.555865  | 0.417679  |
| C  | -7.406328 | 3.696397  | -0.026890 |
| C  | -7.358356 | 4.762372  | -0.897480 |
| C  | -6.599384 | 4.618088  | -2.083859 |
| C  | -5.925102 | 3.441315  | -2.354289 |
| C  | -5.979353 | 2.362287  | -1.431265 |
| N  | -6.724000 | 2.565565  | -0.309223 |
| H  | -6.547635 | 5.445195  | -2.796927 |
| H  | -7.983711 | 3.671100  | 0.898544  |
| H  | -7.899804 | 5.681766  | -0.672872 |
| H  | -5.340849 | 3.320440  | -3.267692 |
| S  | -5.128169 | -1.304169 | 2.637126  |
| S  | -5.173881 | 0.859650  | -1.622651 |
| C  | 2.219625  | -1.556219 | -0.620094 |
| C  | 3.249402  | -2.485160 | -0.363750 |
| C  | 2.559455  | -0.195028 | -0.780546 |
| C  | 4.567587  | -2.064609 | -0.232093 |
| H  | 2.988332  | -3.540871 | -0.260941 |
| C  | 3.882268  | 0.218864  | -0.660923 |
| H  | 1.782772  | 0.532675  | -1.025222 |
| C  | 4.906866  | -0.704952 | -0.378772 |
| H  | 5.353015  | -2.791272 | -0.021513 |
| H  | 4.134608  | 1.271712  | -0.792833 |
| C  | 6.314601  | -0.258914 | -0.253263 |
| C  | 8.514385  | -0.743722 | 0.088711  |
| C  | 7.864516  | 1.410863  | -0.264496 |
| C  | 8.203130  | 2.852183  | -0.398434 |
| C  | 9.538170  | 3.284911  | -0.291182 |
| C  | 7.192917  | 3.803746  | -0.633423 |
| C  | 9.854253  | 4.638572  | -0.416865 |
| H  | 10.324054 | 2.551019  | -0.109007 |
| C  | 7.512144  | 5.156739  | -0.757933 |
| H  | 6.157077  | 3.472681  | -0.716572 |
| C  | 8.842954  | 5.578269  | -0.650318 |

|   |           |           |           |
|---|-----------|-----------|-----------|
| H | 10.894642 | 4.962812  | -0.332177 |
| H | 6.719106  | 5.886681  | -0.939520 |
| C | 9.588208  | -1.738622 | 0.347668  |
| C | 9.277793  | -3.104947 | 0.482129  |
| C | 10.929844 | -1.328186 | 0.460234  |
| C | 10.287146 | -4.038234 | 0.723339  |
| H | 8.239525  | -3.427326 | 0.395381  |
| C | 11.936960 | -2.263986 | 0.701265  |
| H | 11.174981 | -0.270549 | 0.356640  |
| C | 11.619128 | -3.621101 | 0.833449  |
| H | 10.034122 | -5.096634 | 0.825819  |
| H | 12.975343 | -1.933529 | 0.786472  |
| C | -0.094053 | -1.372834 | -0.344087 |
| H | 0.011891  | -0.412044 | 0.192018  |
| H | 12.408976 | -4.353150 | 1.021809  |
| H | 9.091730  | 6.638369  | -0.748162 |
| N | 6.581616  | 1.047844  | -0.384404 |
| N | 8.859380  | 0.545108  | -0.030146 |
| N | 7.254412  | -1.183951 | -0.014342 |
| N | 0.917801  | -2.044152 | -0.752457 |
| H | -9.382101 | -3.130418 | -1.135313 |
| H | -6.766108 | 1.724638  | 0.319413  |
| H | -6.779295 | 0.262741  | 0.941263  |
| O | -8.872324 | 1.480233  | 1.603637  |
| H | -9.320195 | 1.421238  | 0.745116  |
| H | -8.043471 | 0.971599  | 1.445208  |

Thermal correction to Gibbs Free Energy= 0.5903730 (A.U.)

Electronic Energy= -4195.4368667 (A.U.)

The number of imaginary frequencies: 1

### TS<sub>5</sub>[Fe-OCHO]\*

|     |          |           |          |
|-----|----------|-----------|----------|
| 0 1 |          |           |          |
| C   | 7.398630 | -0.348750 | 1.368908 |
| N   | 6.071153 | -0.441881 | 1.191910 |
| C   | 5.381239 | -1.413903 | 1.844168 |
| C   | 6.028901 | -2.339413 | 2.671794 |
| C   | 7.409992 | -2.250129 | 2.839478 |
| C   | 8.105956 | -1.231847 | 2.181769 |
| Fe  | 4.969647 | 0.741312  | 0.082520 |
| N   | 3.536001 | -0.335116 | 0.819745 |
| C   | 2.233443 | -0.163738 | 0.567863 |
| C   | 1.243231 | -1.002794 | 1.092791 |



|   |           |           |           |
|---|-----------|-----------|-----------|
| C | 1.647870  | -2.073431 | 1.911864  |
| C | 2.998634  | -2.249421 | 2.174278  |
| C | 3.931169  | -1.360632 | 1.618053  |
| S | 4.975269  | -0.650509 | -1.836291 |
| C | 6.419580  | -1.600571 | -1.912448 |
| N | 7.638813  | -1.054270 | -1.651405 |
| C | 8.795172  | -1.751866 | -1.674165 |
| C | 8.807772  | -3.093938 | -1.989774 |
| C | 7.576596  | -3.707274 | -2.299877 |
| C | 6.401780  | -2.974199 | -2.263243 |
| S | 4.667209  | 2.507722  | 1.663005  |
| C | 3.788228  | 3.071430  | 0.268023  |
| N | 3.839688  | 2.162365  | -0.741156 |
| C | 3.260122  | 2.414005  | -1.923209 |
| C | 2.561421  | 3.593977  | -2.161209 |
| C | 2.478483  | 4.539050  | -1.124230 |
| C | 3.093157  | 4.285618  | 0.098368  |
| H | 5.440092  | -3.440904 | -2.480441 |
| H | 7.544975  | -4.768609 | -2.559400 |
| H | 9.746075  | -3.649198 | -2.001735 |
| H | 9.694707  | -1.181636 | -1.432760 |
| H | 3.053495  | 5.005222  | 0.918487  |
| H | 1.935882  | 5.475986  | -1.278040 |
| H | 2.095965  | 3.770531  | -3.132358 |
| H | 3.366029  | 1.640766  | -2.689124 |
| H | 1.967262  | 0.674205  | -0.077963 |
| H | 0.899026  | -2.747986 | 2.330481  |
| H | 3.334049  | -3.069839 | 2.808773  |
| H | 5.458995  | -3.115322 | 3.182943  |
| H | 7.933979  | -2.963129 | 3.479680  |
| H | 9.186305  | -1.118335 | 2.288044  |
| H | 7.902878  | 0.447301  | 0.818886  |
| H | 7.733279  | -0.000209 | -1.465661 |
| H | 6.255207  | 1.808810  | -0.657237 |
| C | 7.218910  | 2.308878  | -1.077023 |
| O | 8.153259  | 1.497386  | -1.305259 |
| O | 7.138493  | 3.517365  | -1.224082 |
| C | -0.163029 | -0.733230 | 0.773979  |
| H | -0.349346 | 0.140445  | 0.123341  |
| N | -1.110261 | -1.473709 | 1.213594  |
| C | -2.449390 | -1.164313 | 0.964389  |
| C | -3.341788 | -2.228062 | 0.718531  |
| C | -2.955319 | 0.153162  | 0.997427  |
| C | -4.686515 | -1.980344 | 0.468661  |

|   |            |           |           |
|---|------------|-----------|-----------|
| H | -2.953329  | -3.248948 | 0.715580  |
| C | -4.305809  | 0.393622  | 0.764784  |
| H | -2.286916  | 0.984249  | 1.232741  |
| C | -5.191677  | -0.665103 | 0.487987  |
| H | -5.364027  | -2.810022 | 0.264096  |
| H | -4.688237  | 1.414472  | 0.798594  |
| C | -6.627721  | -0.401601 | 0.232218  |
| C | -8.713816  | -1.163299 | -0.276509 |
| C | -8.362450  | 1.064047  | 0.048069  |
| C | -8.883544  | 2.455208  | 0.103150  |
| C | -10.247979 | 2.716386  | -0.123359 |
| C | -8.019229  | 3.530243  | 0.383491  |
| C | -10.735340 | 4.023188  | -0.070128 |
| H | -10.921722 | 1.886630  | -0.340115 |
| C | -8.509576  | 4.835920  | 0.435389  |
| H | -6.961230  | 3.332352  | 0.559427  |
| C | -9.868368  | 5.086487  | 0.209078  |
| H | -11.796980 | 4.213757  | -0.247121 |
| H | -7.828839  | 5.662768  | 0.653607  |
| H | -10.251304 | 6.109652  | 0.250496  |
| C | -9.632266  | -2.288937 | -0.591502 |
| C | -9.152192  | -3.611388 | -0.634296 |
| C | -10.994346 | -2.047410 | -0.851552 |
| C | -10.015804 | -4.667167 | -0.930018 |
| H | -8.097464  | -3.802885 | -0.433536 |
| C | -11.855370 | -3.105361 | -1.147215 |
| H | -11.370287 | -1.024121 | -0.820288 |
| C | -11.369291 | -4.417751 | -1.187259 |
| H | -9.631751  | -5.690040 | -0.960236 |
| H | -12.911160 | -2.905720 | -1.347633 |
| H | -12.044708 | -5.245620 | -1.418955 |
| N | -7.060620  | 0.865335  | 0.288767  |
| N | -9.220325  | 0.076127  | -0.238873 |
| N | -7.424762  | -1.442318 | -0.046262 |

Thermal correction to Gibbs Free Energy= 0.5762290 (A.U.)

Electronic Energy= -4307.6487756 (A.U.)

The number of imaginary frequencies: 1

## 12. Comparisons of catalytic activity

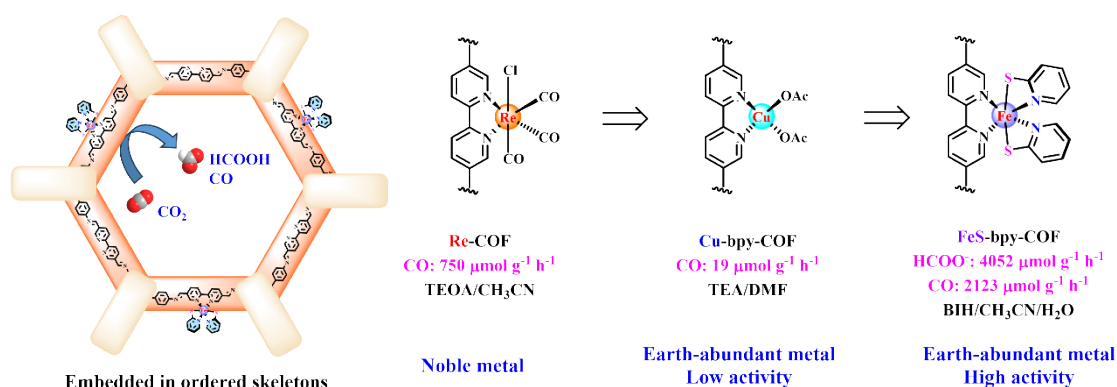

**Table S9** Comparison of the performance of Photocatalytic CO<sub>2</sub> conversion with reported photocatalysts.

| Catalyst                      | Photosensitizer<br>Sacrificial agent           | Reaction<br>solvent                 | Product Yield<br>( $\mu\text{mol g}^{-1} \text{h}^{-1}$ )        | TON           | Irradiation<br>condition                         | Ref              |
|-------------------------------|------------------------------------------------|-------------------------------------|------------------------------------------------------------------|---------------|--------------------------------------------------|------------------|
| Fe-bpy-COF                    | pySH<br>BIH                                    | CH <sub>3</sub> CN/H <sub>2</sub> O | 4052 (HCOO <sup>-</sup> )<br>2123 (CO)                           | 46<br>4h      | $\lambda \geq 400 \text{ nm}$<br>(300 W Xe lamp) | <b>This work</b> |
| FeS-bpy-COF                   | BIH                                            | CH <sub>3</sub> CN/H <sub>2</sub> O | 264 (HCOO <sup>-</sup> )<br>94 (CO)                              | 3.1<br>4h     | $\lambda \geq 400 \text{ nm}$<br>(300 W Xe lamp) | <b>This work</b> |
| Re-COF                        | /<br>TEOA                                      | CH <sub>3</sub> CN                  | 750(CO)                                                          | 48<br>20h     | $\lambda \geq 420 \text{ nm}$<br>(225W Xe lamp)  | 2                |
| Ni-TpBpy                      | [Ru(bpy) <sub>3</sub> ]Cl <sub>2</sub><br>TEOA | CH <sub>3</sub> CN/H <sub>2</sub> O | 966(CO)                                                          | 13.6<br>5h    | $\lambda \geq 420 \text{ nm}$<br>(300 W Xe lamp) | 9                |
| Bpy-sp2c-COF                  | /<br>TEOA                                      | CH <sub>3</sub> CN                  | 1040(CO)                                                         | 18.7<br>17.5h | $\lambda \geq 420 \text{ nm}$<br>(300 W Xe lamp) | 10               |
| COF-367-CoII                  | /<br>TEA                                       | CH <sub>3</sub> CN                  | 48.6(HCOO <sup>-</sup> )<br>16.5 (CO)<br>12.8 (CH <sub>4</sub> ) | /             | $\lambda \geq 380 \text{ nm}$<br>(300 W Xe lamp) | 11               |
| COF-367-CoIII                 | /<br>TEA                                       | CH <sub>3</sub> CN                  | 93(HCOO <sup>-</sup> )<br>5.5 (CO)<br>10.1 (CH <sub>4</sub> )    | /             | $\lambda \geq 380 \text{ nm}$<br>(300 W Xe lamp) | 11               |
| COF-367-Co<br>NSs             | [Ru(bpy) <sub>3</sub> ]Cl <sub>2</sub><br>AA   | H <sub>2</sub> O                    | 10162 (CO)                                                       | 20.2<br>2h    | $\lambda \geq 420 \text{ nm}$<br>(300 W Xe lamp) | 12               |
| Co-PI-COF                     | /<br>TEOA                                      | CH <sub>3</sub> CN                  | 50 (HCOO <sup>-</sup> )                                          | /             | $\lambda \geq 420 \text{ nm}$<br>(150 W Xe lamp) | 13               |
| DQTP COF-Co                   | [Ru(bpy) <sub>3</sub> ]Cl <sub>2</sub><br>TEOA | CH <sub>3</sub> CN                  | 1020 (CO)                                                        | 22.5<br>4h    | $\lambda \geq 420 \text{ nm}$<br>(300 W Xe lamp) | 14               |
| Fe SAS/TrCOF                  | [Ru(bpy) <sub>3</sub> ]Cl <sub>2</sub><br>TEOA | CH <sub>3</sub> CN/H <sub>2</sub> O | 980.3 (CO)                                                       | 4.89<br>4h    | $\lambda \geq 420 \text{ nm}$<br>(300 W Xe lamp) | 15               |
| H <sub>2</sub> PReBpy-CO<br>F | /<br>TEA                                       | CH <sub>3</sub> CN                  | 447 (HCOO <sup>-</sup> )<br>1200 (CO)                            | /             | $\lambda \geq 400 \text{ nm}$<br>(300 W Xe lamp) | 16               |
| CoPor-DPP-<br>COF             | [Ru(bpy) <sub>3</sub> ]Cl <sub>2</sub><br>TIPA | CH <sub>3</sub> CN/H <sub>2</sub> O | 10201 (CO)                                                       | /             | $\lambda \geq 420 \text{ nm}$<br>(300 W Xe lamp) | 17               |

|                 |                                                |                                     |                         |            |                                          |    |
|-----------------|------------------------------------------------|-------------------------------------|-------------------------|------------|------------------------------------------|----|
| Co-2,3-DHTA-COF | [Ru(bpy) <sub>3</sub> ]Cl <sub>2</sub><br>TEOA | CH <sub>3</sub> CN/H <sub>2</sub> O | 18000 (CO)              | /          | $\lambda \geq 420$ nm<br>(300 W Xe lamp) | 18 |
| Cu-Bpy-COF      | /<br>TEA                                       | H <sub>2</sub> O                    | 19 (CH <sub>4</sub> )   | /          | $\lambda \geq 420$ nm<br>(300 W Xe lamp) | 4  |
| Cu-Bpy-COF      | /<br>TEA                                       | DMF                                 | 19 (CO)                 | /          | $\lambda \geq 420$ nm<br>(300 W Xe lamp) | 4  |
| Co-TAPT-COF-1   | [Ru(bpy) <sub>3</sub> ]Cl <sub>2</sub><br>TEOA | CH <sub>3</sub> CN/H <sub>2</sub> O | 8390 (CO)               | /          | $\lambda \geq 420$ nm<br>(300 W Xe lamp) | 19 |
| Re-f-COF        | /<br>TEOA                                      | CH <sub>3</sub> CN                  | 790 (CO)                | /          | $\lambda \geq 420$ nm<br>(300 W Xe lamp) | 20 |
| Re@TEB-BPY      | /<br>TEA, BNAH                                 | CH <sub>3</sub> CN/H <sub>2</sub> O | 2050 (CH <sub>4</sub> ) | 3.1<br>12h | $\lambda \geq 400$ nm<br>(300 W Xe lamp) | 21 |
| TFBD-COF-Co-SA  | [Ru(bpy) <sub>3</sub> ]Cl <sub>2</sub><br>TEOA | CH <sub>3</sub> CN                  | 1480 (CO)               | /          | $\lambda \geq 420$ nm<br>(300 W Xe lamp) | 22 |
| HOF-25-Re       | [Ru(bpy) <sub>3</sub> ]Cl <sub>2</sub><br>TIPA | CH <sub>3</sub> CN                  | 3030 (CO)               | 50.4<br>2h | $\lambda \geq 420$ nm<br>(300 W Xe lamp) | 23 |
| NiPc-CoPOP      | [Ru(bpy) <sub>3</sub> ]Cl <sub>2</sub><br>TEOA | CH <sub>3</sub> CN/H <sub>2</sub> O | 1942 (CO)               | /          | $\lambda \geq 400$ nm<br>(White LED)     | 24 |

### 13. References

1. Y. K. Zhang, L. Zhao, W. J. Xie, H. R. Li and L. N. He, *ChemSusChem*, 2024, **17**, e202400090.
2. S. Yang, W. Hu, X. Zhang, P. He, B. Pattengale, C. Liu, M. Cendejas, I. Hermans, X. Zhang, J. Zhang and J. Huang, *J. Am. Chem. Soc.*, 2018, **140**, 14614-14618.
3. M. Khrizanforov, S. Strelakova, V. Khrizanforova, V. Grinenko, K. Kholin, M. Kadirov, T. Burganov, A. Gubaidullin, T. Gryaznova, O. Sinyashin, L. Xu, D. A. Vicic and Y. Budnikova, *Dalton Trans*, 2015, **44**, 19674-19681.
4. Y. Zhang, L. Cao, G. Bai and X. Lan, *Small*, 2023, **19**, 2300035.
5. F. Weigend and R. Ahlrichs, *Phys. Chem. Chem. Phys.*, 2005, **7**, 3297-3305.
6. Z. Liu, T. Lu and Q. Chen, *Carbon*, 2020, **165**, 461-467.
7. M. J. Frisch, G. W. Trucks, H. B. Schlegel, G. E. Scuseria, M. A. Robb, J. R. Cheeseman, G. Scalmani, V. Barone, G. A. Petersson, H. Nakatsuji, X. Li, M. Caricato, A. V. Marenich, J. Bloino, B. G. Janesko, R. Gomperts, B. Mennucci, H. P. Hratchian, J. V. Ortiz, A. F. Izmaylov, J. L. Sonnenberg, Williams, F. Ding, F. Lipparini, F. Egidi, J. Goings, B. Peng, A. Petrone, T. Henderson, D. Ranasinghe, V. G. Zakrzewski, J. Gao, N. Rega, G. Zheng, W. Liang, M. Hada, M. Ehara, K. Toyota, R. Fukuda, J. Hasegawa, M. Ishida, T. Nakajima, Y. Honda, O. Kitao, H. Nakai, T. Vreven, K. Throssell, J. A. Montgomery Jr., J. E. Peralta, F. Ogliaro, M. J. Bearpark, J. J. Heyd, E. N. Brothers, K. N. Kudin, V. N. Staroverov, T. A. Keith, R. Kobayashi, J. Normand, K. Raghavachari, A. P. Rendell, J. C. Burant, S. S. Iyengar, J. Tomasi, M. Cossi, J. M. Millam, M. Klene, C. Adamo, R. Cammi, J. W. Ochterski, R. L. Martin, K. Morokuma, O. Farkas, J. B. Foresman and D. J. Fox, *Journal*, 2016.
8. H. J. Kuhn, S. E. Braslavsky and R. Schmidt, *Pure Appl. Chem.*, 2004, **76**, 2105-2146.
9. W. Zhong, R. Sa, L. Li, Y. He, L. Li, J. Bi, Z. Zhuang, Y. Yu and Z. Zou, *J. Am. Chem. Soc.*, 2019, **141**, 7615-7621.

10. Z. Fu, X. Wang, A. M. Gardner, X. Wang, S. Y. Chong, G. Neri, A. J. Cowan, L. Liu, X. Li, A. Vogel, R. Clowes, M. Bilton, L. Chen, R. S. Sprick and A. I. Cooper, *Chem. Sci.*, 2020, **11**, 543-550.
11. Y. N. Gong, W. Zhong, Y. Li, Y. Qiu, L. Zheng, J. Jiang and H. L. Jiang, *J. Am. Chem. Soc.*, 2020, **142**, 16723-16731.
12. W. Liu, X. Li, C. Wang, H. Pan, W. Liu, K. Wang, Q. Zeng, R. Wang and J. Jiang, *J. Am. Chem. Soc.*, 2019, **141**, 17431-17440.
13. T. Skorjanc, D. Shetty, M. E. Mahmoud, F. Gándara, J. I. Martinez, A. K. Mohammed, S. Boutros, A. Merhi, E. O. Shehayeb, C. A. Sharabati, P. Damacet, J. Raya, S. Gardonio, M. Hmadeh, B. R. Kaafarani and A. Trabolsi, *ACS Appl. Mater. Interfaces*, 2021, **14**, 2015-2022.
14. M. Lu, Q. Li, J. Liu, F.-M. Zhang, L. Zhang, J.-L. Wang, Z.-H. Kang and Y.-Q. Lan, *Appl. Catal., B*, 2019, **254**, 624-633.
15. L. Ran, Z. Li, B. Ran, J. Cao, Y. Zhao, T. Shao, Y. Song, M. K. H. Leung, L. Sun and J. Hou, *J. Am. Chem. Soc.*, 2022, **144**, 17097-17109.
16. D. Song, W. Xu, J. Li, J. Zhao, Q. Shi, F. Li, X. Sun and N. Wang, *Chin. J. Catal.*, 2022, **43**, 2425-2433.
17. X. Wang, X. Ding, T. Wang, K. Wang, Y. Jin, Y. Han, P. Zhang, N. Li, H. Wang and J. Jiang, *ACS Appl. Mater. Interfaces*, 2022, **14**, 41122-41130.
18. Q. Zhang, S. Gao, Y. Guo, H. Wang, J. Wei, X. Su, H. Zhang, Z. Liu and J. Wang, *Nat. Commun.*, 2023, **14**, 1147.
19. W. Zhou, X. Wang, W. Zhao, N. Lu, D. Cong, Z. Li, P. Han, G. Ren, L. Sun, C. Liu and W.-Q. Deng, *Nat. Commun.*, 2023, **14**, 6971.
20. D. H. Streater, E. R. Kennehan, D. Wang, C. Fiankor, L. Chen, C. Yang, B. Li, D. Liu, F. Ibrahim, I. Hermans, K. L. Kohlstedt, L. Luo, J. Zhang and J. Huang, *J. Am. Chem. Soc.*, 2024, **146**, 4489-4499.
21. F. A. Rahimi, S. Dey, P. Verma and T. K. Maji, *ACS Catal.*, 2023, **13**, 5969-5978.
22. Y. Yang, Y. Lu, H.-Y. Zhang, Y. Wang, H.-L. Tang, X.-J. Sun, G. Zhang and F.-M. Zhang, *ACS Sustainable Chem. Eng.*, 2021, **9**, 13376-13384.
23. B. Yu, L. Li, S. Liu, H. Wang, H. Liu, C. Lin, C. Liu, H. Wu, W. Zhou, X. Li, T. Wang, B. Chen and J. Jiang, *Angew. Chem. Int. Ed.*, 2021, **60**, 8983-8989.
24. X. Y. Dong, Y. N. Si, Q. Y. Wang, S. Wang and S. Q. Zang, *Adv. Mater.*, 2021, **33**, 2101568.
